# Supplementary material for: Nutritional deficiency recapitulates intestinal injury associated with environmental enteric dysfunction in patient-derived Organ Chips
Source: bioRxiv or medRxiv preprint supplement (doi:10.1101/2021.10.11.21264722), 2021-10-14
Supplement: Supplementary file [file media-1.pdf]

## EED Con vs Healthy Con

| Gene Symbol | Entrez ID | Gene Name                                                      | log2 Fold Change | fdr p-value |
|-------------|-----------|----------------------------------------------------------------|------------------|-------------|
| GTSF1       | 121355    | gametocyte specific factor 1                                   | 4.41793983       | 1.10E-08    |
| NRG4        | 145957    | neuregulin 4                                                   | 3.12293652       | 5.68E-06    |
| PAX8-AS1    | 654433    | PAX8 antisense RNA 1                                           | 2.98478243       | 4.13E-08    |
| LIN7A       | 8825      | lin-7 homolog A, crumbs cell polarity complex component        | 2.37283159       | 7.42E-05    |
| LINC01612   | 101928223 | long intergenic non-protein coding RNA 1612                    | 2.16604493       | 0.00035298  |
| TPK1        | 27010     | thiamin pyrophosphokinase 1                                    | 2.00378543       | 7.42E-05    |
| MUC5AC      | 4586      | mucin 5AC, oligomeric mucus/gel-forming                        | 1.88649666       | 0.00154969  |
| KLK7        | 5650      | kallikrein related peptidase 7                                 | 1.88634197       | 3.97E-06    |
| LINC00470   | 56651     | long intergenic non-protein coding RNA 470                     | 1.83680982       | 0.00573765  |
| WASF3       | 10810     | WAS protein family member 3                                    | 1.83588184       | 0.00024555  |
| FGFBP1      | 9982      | fibroblast growth factor binding protein 1                     | 1.77181911       | 5.33E-05    |
| LRRTM1      | 347730    | leucine rich repeat transmembrane protein 1                    | 1.74864665       | 0.02874077  |
| RHBDL2      | 54933     | rhomboid like 2                                                | 1.73562738       | 1.82E-05    |
| DDX43       | 55510     | DEAD-box helicase 43                                           | 1.67361597       | 0.00086137  |
| NMU         | 10874     | neuromedin U                                                   | 1.59025692       | 0.00621385  |
| ANO3        | 63982     | anoctamin 3                                                    | 1.549945         | 0.00127621  |
| MAL         | 4118      | mal, T cell differentiation protein                            | 1.51479921       | 0.01108006  |
| LSAMP       | 4045      | limbic system associated membrane protein                      | 1.43191611       | 0.01507643  |
| PLIL3       | 53938     | peptidylprolyl isomerase like 3                                | 1.37696011       | 1.82E-05    |
| KIAA1324L   | 222223    | KIAA1324 like                                                  | 1.3755227        | 0.00044403  |
| STOX1       | 219736    | storkhead box 1                                                | 1.31352735       | 0.04197635  |
| PTGR2       | 145482    | prostaglandin reductase 2                                      | 1.25204061       | 0.00017019  |
| RPL22L1     | 200916    | ribosomal protein L22 like 1                                   | 1.21651009       | 0.03356424  |
| ANO1        | 55107     | anoctamin 1                                                    | 1.2118483        | 0.00158989  |
| LOXL1       | 4016      | lysyl oxidase like 1                                           | 1.19401316       | 0.00920896  |
| DMRTA1      | 63951     | DMRT like family A1                                            | 1.17942479       | 0.00547763  |
| TF2         | 7032      | trefoil factor 2                                               | 1.16793288       | 0.00192117  |
| TNNC1       | 7134      | troponin C1, slow skeletal and cardiac                         | 1.14613529       | 0.01512077  |
| EFNA1       | 1942      | ephrin A1                                                      | 1.09930958       | 0.02389728  |
| KNCS3       | 3790      | potassium voltage-gated channel modulator subfamily C member 3 | 1.0620124        | 0.00030281  |
| SLC22A18AS  | 5003      | solute carrier family 22 member 18 antisense RNA               | 1.05187831       | 0.00088552  |
| VGLL1       | 51442     | vestigial like family member 1                                 | 1.04815764       | 0.00272893  |
| MBOAT2      | 129642    | membrane bound O-acyltransferase domain containing 2           | 1.0338448        | 0.01121511  |
| PSCA        | 8000      | prostate stem cell antigen                                     | 1.02895018       | 0.00625832  |
| ILIR2       | 7850      | interleukin 1 receptor type 2                                  | 1.02351285       | 0.01876271  |
| TAS2R50     | 259296    | taste 2 receptor member 50                                     | 1.0083446        | 0.00455289  |
| SCGB2A1     | 4246      | secretoglobin family 2A member 1                               | 0.98545257       | 0.04345233  |
| TDRD9       | 122402    | tudor domain containing 9                                      | 0.97333407       | 0.04927637  |
| LI0044      | 6275      | S100 calcium binding protein A4                                | 0.96129845       | 0.00400244  |
| LUM         | 4060      | lumican                                                        | 0.94612036       | 0.04197635  |
| AKR1E2      | 83592     | aldo-keto reductase family 1 member B subfamily 2 member 2     | 0.94560323       | 0.00435715  |
| PRLR        | 5618      | prolactin receptor                                             | 0.93476547       | 0.00208963  |
| MUC20       | 200958    | mucin 20, cell surface associated                              | 0.92984964       | 0.01952194  |
| FABP12      | 646486    | fatty acid binding protein 12                                  | 0.91195454       | 0.01015691  |
| ABO         | 28        | ABO, alpha 1-3-N-acetylgalactosaminyltransferase               | 0.90755082       | 0.00594497  |
| NUDT2       | 318       | nudix hydrolase 2                                              | 0.87181384       | 0.0034493   |
| MIR4482     | 100616323 | microRNA 4482                                                  | 0.87161899       | 0.02939543  |
| PROCR       | 10544     | protein C receptor                                             | 0.86009933       | 0.01214527  |
| SCARNA6     | 67772     | small Cajal body-specific RNA 6                                | 0.85789833       | 0.00088552  |
| ZNF         | 157695    | testis development related protein                             | 0.85397025       | 0.01431371  |
| TRIP626     | 199777    | zinc finger protein 626                                        | 0.84360423       | 0.02231447  |
| RASSF2      | 9770      | Ras association domain family member 2                         | 0.83354822       | 0.0270896   |
| APIP        | 51074     | APAF1 interacting protein                                      | 0.82393041       | 0.01796505  |
| TMEM44-AS   | 100507297 | TMEM44 antisense RNA 1                                         | 0.81432749       | 0.00831417  |
| SNORD100    | 594838    | small nucleolar RNA, C/D box 100                               | 0.81095994       | 0.00054043  |
| PRMT8       | 56341     | protein arginine methyltransferase 8                           | 0.81048877       | 0.0270896   |
| FAM90A1     | 55138     | family with sequence similarity 90 member A1                   | 0.79435505       | 0.02631144  |
| SNORD123    | 100113384 | small nucleolar RNA, C/D box 123                               | 0.78632376       | 0.04789339  |
| LRAT        | 9227      | lecithin retinol acyltransferase                               | 0.78172839       | 0.00578872  |
| HMSD5       | 284293    | histocompatibility minor serpin domain containing 5            | 0.77678607       | 0.03883982  |
| IFI27       | 3429      | interferon alpha inducible protein 27                          | 0.77628042       | 0.00298835  |
| EDEM1       | 9695      | ER degradation enhancing alpha-mannosidase like 1              | 0.76237503       | 0.02677005  |
| MVB12B      | 89853     | multivesicular body subunit 12B                                | 0.75436655       | 0.02814819  |
| HRASL52     | 54979     | HRAS like suppressor 2                                         | 0.75251072       | 0.00723793  |
| LOXL1-AS1   | 100287616 | LOXL1 antisense RNA 1                                          | 0.73585552       | 0.04269821  |
| ID1         | 3397      | inhibitor of DNA binding 1, HLH protein                        | 0.73433831       | 0.00847148  |
| TMPSR53     | 64699     | transmembrane serine protease 3                                | 0.72952633       | 0.00573715  |
| GSTO2       | 119391    | glutathione S-transferase omega 2                              | 0.68387013       | 0.00738974  |
| GSTO1       | 9446      | glutathione S-transferase omega 1                              | 0.67900013       | 0.00529558  |
| RNASEH2B    | 79621     | ribonuclease H2 subunit B                                      | 0.67289754       | 0.035878    |
| LTB         | 4050      | lymphotoxin beta                                               | 0.66906488       | 0.03757834  |

## Healthy -N/-T vs Healthy Con

| Gene Symbol | Entrez ID | Gene Name                                                     | log2 Fold Change | fdr p-value |
|-------------|-----------|---------------------------------------------------------------|------------------|-------------|
| ALDH1L2     | 160428    | aldehyde dehydrogenase 1 family class 1 member 2              | 3.08035169       | 2.17E-05    |
| SLC34A2     | 10568     | solute carrier family 34 member 2                             | 2.74018488       | 3.28E-05    |
| CBS         | 875       | cystathionine-beta-synthase                                   | 2.63706077       | 6.11E-06    |
| SLC7A5      | 8140      | solute carrier family 7 member 5                              | 2.49469706       | 1.27E-05    |
| CHAC1       | 79049     | ChaC glutathione specific gamma-glutamylcysteine synthetase   | 2.45779746       | 2.73E-05    |
| GRPR87      | 53836     | G protein-coupled receptor 87                                 | 2.42118487       | 0.00029568  |
| CTH         | 1491      | cystathionine gamma-lyase                                     | 2.30988468       | 2.17E-05    |
| STC2        | 8614      | stanniocalcin 2                                               | 2.23778545       | 4.18E-05    |
| PHGDH       | 26227     | phosphoglycerate dehydrogenase                                | 2.08144874       | 2.17E-05    |
| SLC7A11     | 23657     | solute carrier family 7 member 11                             | 2.06908589       | 2.17E-05    |
| PSAT1       | 29968     | phosphoserine aminotransferase 1                              | 1.99268486       | 2.17E-05    |
| ASNS        | 440       | asparagine synthetase (glutamine-forming) cytosolic           | 1.96899283       | 0.0002635   |
| CACNA2D1    | 781       | calcium voltage-gated channel alpha 2D1 subunit               | 1.91168203       | 0.00026353  |
| SLC16A7     | 9194      | solute carrier family 16 member 7                             | 1.83400879       | 0.0089459   |
| TRIB3       | 57761     | tribbles pseudokinase 3                                       | 1.83150638       | 2.17E-05    |
| SLCGA9      | 6536      | solute carrier family 6 member 9                              | 1.78963919       | 3.28E-05    |
| CPE         | 1363      | carboxypeptidase E                                            | 1.78405554       | 0.00114511  |
| UNC93A      | 54346     | unc-93 homolog A                                              | 1.74236802       | 3.28E-05    |
| NMUR2       | 56923     | neuromedin U receptor 2                                       | 1.67014071       | 0.01428227  |
| PSTPIP2     | 9050      | proline-serine-threonine phosphatase interacting protein 2    | 1.66706736       | 0.0014969   |
| CNDP1       | 84735     | carnosine dipeptidase 1                                       | 1.62943183       | 0.00263169  |
| EFHC2       | 80258     | EF-hand domain containing 2                                   | 1.59438732       | 0.00776682  |
| YARS        | 8565      | tyrosyl-tRNA synthetase                                       | 1.56695697       | 7.41E-05    |
| SLC38A3     | 10991     | solute carrier family 38 member 3                             | 1.54941652       | 0.0013548   |
| UGT3A1      | 133688    | UDP glucosyltransferase family 3 member A1                    | 1.5394862        | 0.00220868  |
| CASP1       | 834       | caspace 1                                                     | 1.52538289       | 0.00274473  |
| TINAG       | 27283     | tubulointerstitial nephritis antigen                          | 1.52139025       | 0.02211568  |
| NR1H4       | 9971      | nuclear receptor subfamily 1 group 4 member 4                 | 1.50768784       | 0.01868743  |
| MTHFDL15    | 25902     | methylenetetrahydrofolate dehydrogenase 15                    | 1.48923805       | 7.41E-05    |
| AJUBA       | 84962     | ajuba LIM protein                                             | 1.4644514        | 2.17E-05    |
| SORBS2      | 8470      | sorbin and SH3 domain containing protein 2                    | 1.41220694       | 0.0229408   |
| PCK2        | 5106      | phosphoenolpyruvate carboxykinase (cytosolic)                 | 1.39639368       | 0.00114511  |
| SLCIA5      | 6510      | solute carrier family 1 member 5                              | 1.37822339       | 0.0002599   |
| VLDLR-AS1   | 404195    | VLDLR antisense RNA 1                                         | 1.36885219       | 0.0034678   |
| DDIT3       | 1649      | DNA damage inducible transcript 3                             | 1.36020178       | 0.00244751  |
| GARS        | 2617      | glycyl-tRNA synthetase                                        | 1.35796964       | 3.28E-05    |
| PTPRB       | 5787      | protein tyrosine phosphatase, receptor type B                 | 1.35742881       | 0.00428372  |
| PPP1R1B     | 84152     | protein phosphatase 1 regulatory subunit 1B                   | 1.35343256       | 8.27E-05    |
| IRAK2       | 3656      | interleukin 1 receptor associated kinase 2                    | 1.33762918       | 6.58E-05    |
| SERPINB7    | 8710      | serpin family B member 7                                      | 1.33427254       | 0.00244751  |
| EIF4EBP1    | 1978      | eukaryotic translation initiation factor 4E binding protein 1 | 1.3339503        | 0.0009126   |
| TBL1X       | 6907      | transducin beta like 1 X-linked                               | 1.31068084       | 0.0005299   |
| IRF8        | 3394      | interferon regulatory factor 8                                | 1.31027432       | 0.00024267  |
| SLC7A1      | 6541      | solute carrier family 7 member 1                              | 1.30973845       | 0.00031413  |
| GSTM2       | 2946      | glutathione S-transferase mu 2                                | 1.30297194       | 8.59E-05    |
| REG3A       | 5068      | regenerating family member 3 alpha                            | 1.29890128       | 0.00047911  |
| SLC7A2      | 6542      | solute carrier family 7 member 2                              | 1.29138248       | 0.0130601   |
| GSTM1       | 2944      | glutathione S-transferase mu 1                                | 1.28994123       | 7.71E-05    |
| LURAP1L-AS1 | 101929467 | LURAP1L antisense RNA 1                                       | 1.28982237       | 0.0182953   |
| ACSM3       | 6296      | acyl-CoA synthetase medium chain family member 3              | 1.28574323       | 0.0020531   |
| SLCIA4      | 6509      | solute carrier family 1 member 4                              | 1.27918992       | 0.00058234  |
| LAMB1       | 3912      | laminin subunit beta 1                                        | 1.27903294       | 0.01252953  |
| ANXA13      | 312       | annexin A13                                                   | 1.27258405       | 0.00204158  |
| EPB414A-AS  | 114915    | EPB414A antisense RNA 1                                       | 1.27179272       | 0.01597138  |
| GPC4        | 2239      | glypican 4                                                    | 1.27115366       | 0.00578861  |
| MTHFD2      | 10797     | methylenetetrahydrofolate dehydrogenase 2                     | 1.26985188       | 7.71E-05    |
| TSC2D3      | 1831      | TSC2 domain family member 3                                   | 1.25969788       | 0.00238505  |
| VLDLR       | 7436      | very low density lipoprotein receptor                         | 1.24799098       | 0.0385069   |
| ANKRD30B    | 374860    | ankyrin repeat domain 30B                                     | 1.2453363        | 0.02352005  |
| AARS        | 16        | alanyl-tRNA synthetase                                        | 1.23123232       | 0.00021703  |
| SARS        | 6801      | seryl-tRNA synthetase                                         | 1.22959942       | 0.00021703  |
| GRB10       | 2307      | growth factor receptor bound protein 10                       | 1.22742499       | 0.00270845  |
| GSTM4       | 2948      | glutathione S-transferase mu 4                                | 1.22110364       | 4.63E-05    |
| KCNJ3       | 3760      | potassium voltage-gated channel subunit 3                     | 1.21240081       | 0.01330834  |
| EFNA5       | 1946      | ephrin A5                                                     | 1.20925205       | 0.00065494  |
| IARS        | 3376      | isoleucyl-tRNA synthetase                                     | 1.20743396       | 0.00038205  |
| LCN2        | 3934      | lipocalin 2                                                   | 1.19492939       | 0.00268158  |
| CNMF        | 441549    | cerebral dopamine neurotrophic factor                         | 1.19043811       | 0.00334678  |
| SHMT2       | 6472      | serine hydroxymethyltransferase 2                             | 1.18486535       | 0.0004868   |
| BVES        | 11149     | blood vessel epicardial substance                             | 1.17970442       | 0.01288736  |
| IFRD1       | 3475      | interferon related development                                | 1.16854453       | 0.00194046  |

## EED -N/-T vs EED Con

| Gene Symbol | Entrez ID | Gene Name                                                   | log2 Fold Change | fdr p-value |
|-------------|-----------|-------------------------------------------------------------|------------------|-------------|
| SMOC2       | 64094     | SPARC related modular calcium binding 2                     | 4.48634349       | 0.020645    |
| CPY4X1      | 260293    | cytochrome P450 family 4 subfamily X member 1               | 3.15295227       | 0.00161934  |
| LCN2        | 3934      | lipocalin 2                                                 | 2.71459683       | 1.26E-05    |
| DUOXA2      | 405753    | dual oxidase maturation factor 2                            | 2.64785989       | 0.00451952  |
| CPVL        | 54504     | carboxypeptidase, vitellogenic like                         | 2.39793383       | 0.00987848  |
| GRPR87      | 53836     | G protein-coupled receptor 87                               | 2.34034135       | 0.00022764  |
| CXCL5       | 6374      | C-X-C motif chemokine ligand 5                              | 2.19376047       | 6.84E-05    |
| CASP1       | 834       | caspace 1                                                   | 2.13068643       | 0.0001383   |
| ALDH1L2     | 160428    | aldehyde dehydrogenase 1 family member 2                    | 2.12030114       | 0.00017329  |
| CCL20       | 6364      | C-C motif chemokine ligand 20                               | 2.11944603       | 4.76E-05    |
| NMUR2       | 56923     | neuromedin U receptor 2                                     | 2.1120437        | 0.00248926  |
| DUOX2       | 50506     | dual oxidase 2                                              | 2.10072554       | 0.0146251   |
| SLC7A5      | 8140      | solute carrier family 7 member 5                            | 2.09728229       | 1.45E-05    |
| CHAC1       | 79094     | ChaC glutathione specific gamma-glutamylcysteine synthetase | 2.06106263       | 6.89E-05    |
| SERPINA3    | 12        | serpin family A member 3                                    | 2.02221873       | 0.00017377  |
| BCAT1       | 586       | branched chain amino acid transaminase 1                    | 2.00430496       | 0.00035662  |
| PHGDH       | 26227     | phosphoglycerate dehydrogenase                              | 2.00192792       | 2.46E-05    |
| SORBS2      | 8470      | sorbin and SH3 domain containing 2                          | 1.9876577        | 0.00247061  |
| CBS         | 875       | cystathionine-beta-synthase                                 | 1.96868666       | 1.45E-05    |
| ASNS        | 440       | asparagine synthetase (glutamine-forming) cytosolic         | 1.96248706       | 0.00015689  |
| SLC38A4     | 55089     | solute carrier family 38 member 4                           | 1.94973855       | 0.00112841  |
| TOX         | 9760      | thymocyte selection associated high mobility group box 1    | 1.90088652       | 0.0006214   |
| SLC34A2     | 10568     | solute carrier family 34 member 2                           | 1.90070311       | 0.00033995  |
| LAMB1       | 3912      | laminin subunit beta 1                                      | 1.85472633       | 0.00080724  |
| STC2        | 8614      | stanniocalcin 2                                             | 1.80626433       | 0.0001383   |
| THBS2       | 7058      | thrombospondin 2                                            | 1.78276879       | 0.00088789  |
| PSAT1       | 29968     | phosphoserine aminotransferase 1                            | 1.7288413        | 3.97E-05    |
| ANXA13      | 312       | annexin A13                                                 | 1.6896341        | 0.0001383   |
| TGFB1       | 7045      | transforming growth factor beta induced                     | 1.64928826       | 0.0238806   |
| PARM1       | 25849     | prostate androgen-regulated mucin-like protein 1            | 1.60568589       | 0.00013484  |
| COLGALT2    | 23127     | collagen beta(1-O)galactosyltransferase 2                   | 1.60155099       | 0.0249487   |
| LRRTM1      | 347730    | leucine rich repeat transmembrane protein 1                 | 1.58167585       | 0.01803743  |
| SLCGA9      | 6536      | solute carrier family 6 member 9                            | 1.56151935       | 0.068E-05   |
| SLC7A11     | 23657     | solute carrier family 7 member 11                           | 1.5405555        | 9.88E-05    |
| CD49        | 8618      | calcium dependent secretion activator                       | 1.53791894       | 0.00012323  |
| CASP5       | 838       | caspace 5                                                   | 1.52686645       | 0.00056327  |
| NME5        | 8382      | NME/NM23 family member 5                                    | 1.49073679       | 0.0382558   |
| CTH         | 1491      | cystathionine gamma-lyase                                   | 1.48429777       | 0.00035662  |
| CCL2        | 6347      | C-C motif chemokine ligand 2                                | 1.4840763        |             |

|             |           |                                          |            |            |
|-------------|-----------|------------------------------------------|------------|------------|
| ZNF253      | 56242     | zinc finger protein 253                  | 0.668627   | 0.02230624 |
| ADNP2       | 22850     | ADNP homeobox 2                          | 0.66836105 | 0.03122628 |
| AIFM2       | 84883     | apoptosis inducing factor, mitochondri   | 0.66231693 | 0.04550894 |
| VKORC1      | 79001     | vitamin K epoxide reductase complex s    | 0.64798189 | 0.01010582 |
| SNORA65     | 26783     | small nucleolar RNA, H/ACA box 65        | 0.63618027 | 0.04197635 |
| MRLP23      | 6150      | mitochondrial ribosomal protein L23      | 0.63302795 | 0.06057553 |
| CCLC167     | 154467    | coiled-coil domain containing 167        | 0.62867055 | 0.02572743 |
| PDE2        | 26499     | phosphodiesterase 2                      | 0.62203855 | 0.05737658 |
| LYNX1-SLUR  | 111188157 | LYNX1-SLURP2 readthrough                 | 0.61993487 | 0.02230624 |
| MSI1        | 4440      | musashi RNA binding protein 1            | 0.61538272 | 0.02694007 |
| ENTPD3-AS1  | 285266    | ENTPD3 antisense RNA 1                   | 0.61366698 | 0.04927573 |
| ARL17B      | 100506084 | ADP ribosylation factor like GTPase 17   | 0.6104499  | 0.04686783 |
| ENOS1       | 55556     | enolase superfamily member 1             | 0.59964408 | 0.00621385 |
| MPP7        | 143098    | membrane palmitoylated protein 7         | 0.58517891 | 0.01214527 |
| SNORA71D    | 677840    | small nucleolar RNA, H/ACA box 71D       | 0.58497642 | 0.01475082 |
| RGPD4       | 285190    | RANBP2-like and GRIP domain contain      | -0.5857676 | 0.03959624 |
| SYNPO       | 11346     | synaptotaxin 1                           | -0.5928603 | 0.02206735 |
| HIBCH       | 26275     | 3-hydroxyisobutyryl-CoA hydrolase        | -0.5953505 | 0.04711205 |
| SLC22A3     | 6581      | solute carrier family 22 member 3        | -0.5963663 | 0.04398883 |
| GLIS3       | 169792    | GLIS family zinc finger 3                | -0.5976854 | 0.0357315  |
| STAP2       | 55620     | signal transducing adaptor family mem    | -0.599028  | 0.00845289 |
| ABHD4       | 63874     | abhydrolase domain containing 4          | -0.6010948 | 0.01138367 |
| SLCO2B1     | 11309     | solute carrier organic anion transporte  | -0.6021678 | 0.035878   |
| SLC28A3     | 64078     | solute carrier family 28 member 3        | -0.6041667 | 0.04943809 |
| RGPD6       | 729540    | RANBP2-like and GRIP domain contain      | -0.6060312 | 0.03044073 |
| ANO9        | 338440    | anocytamin 9                             | -0.6071596 | 0.04546514 |
| RAB3D       | 9545      | RAB3D, member RAS oncogene family        | -0.6085996 | 0.0341013  |
| ATP6V0A1    | 535       | ATPase H+ transporting V0 subunit a1     | -0.6094194 | 0.03356424 |
| GITA        | 4261      | class II major histocompatibility compl  | -0.6098478 | 0.02079863 |
| CAC19       | 103021155 | canon susceptibility 19 (non-protein co  | -0.6103209 | 0.0325232  |
| KRT23       | 25984     | keratin 23                               | -0.6142352 | 0.01928252 |
| SLC39A14    | 23516     | solute carrier family 39 member 14       | -0.6158999 | 0.01313279 |
| CTSH        | 1512      | cathepsin H                              | -0.6182198 | 0.01216356 |
| ENAM        | 10117     | enamelin                                 | -0.6206703 | 0.03681161 |
| POU3F2      | 5454      | POU class 3 homeobox 2                   | -0.6315745 | 0.03080136 |
| POU6F2-AS1  | 100861520 | POU6F2 antisense RNA 1                   | -0.631734  | 0.04796362 |
| ABCA7       | 10347     | ATP binding cassette subfamily A mem     | -0.6335189 | 0.00860224 |
| SERPINA6    | 866       | serpin family A member 6                 | -0.6335306 | 0.0453178  |
| GLS         | 2744      | glutaminase                              | -0.6340147 | 0.03668675 |
| ANOS        | 203859    | anocytamin 5                             | -0.6386074 | 0.0386933  |
| AFAP1L2     | 84632     | actin filament associated protein 1 like | -0.640988  | 0.03738974 |
| KCNE3       | 10008     | potassium voltage-gated channel subf     | -0.6429688 | 0.02814819 |
| BLOC1C5-TX1 | 100526836 | BLOC1C5-TXDC5 readthrough (NMD c         | -0.6480668 | 0.01966698 |
| SEMA3F      | 6405      | semaphorin 3F                            | -0.6546697 | 0.0335239  |
| GSTM2       | 2946      | glutathione S-transferase mu 2           | -0.6551581 | 0.01966968 |
| CFB         | 629       | complement factor B                      | -0.6562668 | 0.00772465 |
| ADGRE5      | 976       | adhesion G protein-coupled receptor E    | -0.6582561 | 0.03782629 |
| NBPF1       | 55672     | NBPF member 1                            | -0.6599492 | 0.0102652  |
| PLEKHG5     | 57449     | pleckstrin homology and RhoGEF doma      | -0.662363  | 0.03881281 |
| PPT2        | 9374      | palmitoyl-protein thioesterase 2         | -0.6626372 | 0.03189816 |
| HLA1        | 10086     | HERV-H LTR-associating 1                 | -0.6645835 | 0.02079863 |
| METTL7B     | 196410    | methyltransferase like 7B                | -0.6652334 | 0.00625832 |
| PDE4C       | 5143      | phosphodiesterase 4C                     | -0.6659495 | 0.02230624 |
| KLK10       | 5655      | kallikrein related peptidase 10          | -0.6688031 | 0.02873255 |
| FAR2        | 55711     | fatty acyl-CoA reductase 2               | -0.6705745 | 0.02004453 |
| CDHR5       | 53841     | cadherin related family member 5         | -0.6795516 | 0.03912011 |
| TIMP1       | 7076      | TIMP metalloproteinase inhibitor 1       | -0.6810235 | 0.03959624 |
| ADAMT59     | 56999     | ADAM metalloproteinase with thrombo      | -0.6811933 | 0.0456514  |
| LHRG1       | 116844    | leucine rich alpha-2-glycoprotein 1      | -0.6815102 | 0.01062902 |
| DHR4-AS1    | 55449     | DHR4 antisense RNA 1                     | -0.6921064 | 0.04565479 |
| ARHGEF35    | 445328    | Rho guanine nucleotide exchange facto    | -0.6943434 | 0.01342092 |
| SPTLC3      | 55304     | serine palmitoyltransferase long chain   | -0.6955085 | 0.00724541 |
| ZNF829      | 374899    | zinc finger protein 829                  | -0.6956072 | 0.04367796 |
| MTX         | 4501      | metallothionein 1X                       | -0.7012308 | 0.02079863 |
| DNAH3       | 55567     | dynein axonemal heavy chain 3            | -0.7126973 | 0.04565868 |
| CKNKR1      | 10256     | connector enhancer of kinase suppress    | -0.712907  | 0.02382858 |
| TXNDC5      | 81567     | thioredoxin domain containing 5          | -0.7166532 | 0.02399044 |
| GSTM4       | 2948      | glutathione S-transferase mu 4           | -0.7175126 | 0.00384047 |
| RNF130      | 55819     | ring finger protein 130                  | -0.7179063 | 0.01074716 |
| NPC1L1      | 29881     | NPC1 like intracellular cholesterol tran | -0.7186945 | 0.01966698 |
| CELF2       | 10659     | CUGBP Elav-like family member 2          | -0.71891   | 0.03044073 |
| PHLBD2      | 90102     | pleckstrin homology like domain family   | -0.7210859 | 0.04369222 |
| FAIM        | 55179     | Fas apoptotic inhibitory molecule        | -0.7222386 | 0.02404967 |
| STEAP3      | 55240     | STEAP3 metalloenductase                  | -0.7222582 | 0.02004453 |

|            |           |                                   |            |            |
|------------|-----------|-----------------------------------|------------|------------|
| NAALADL2   | 254827    | N-acetylated alpha-linked acidic  | 1.16845636 | 0.00336931 |
| XPOT       | 11260     | exportin for tRNA                 | 1.16212099 | 0.00090947 |
| RNOCI      | 5954      | reticulocalbin 1                  | 1.16166613 | 4.74E-05   |
| MEF2C      | 4208      | myocyte enhancer factor 2C        | 1.15672797 | 0.00502614 |
| NEB        | 4703      | nebulin                           | 1.1505149  | 0.02096246 |
| JMY        | 133746    | junction mediating and regulator  | 1.15049796 | 0.00093113 |
| SLC3A2     | 6520      | solute carrier family 3 member 2  | 1.14971744 | 0.00038205 |
| ALDH3A1    | 21EM18    | aldehyde dehydrogenase 3 famill   | 1.14934698 | 0.00620708 |
| MSI1       | 4440      | musashi RNA binding protein 1     | 1.14880652 | 0.0002599  |
| SLC43A1    | 8501      | solute carrier family 43 member   | 1.14217642 | 0.00304581 |
| SERPINA3   | 12        | serpin family A member 3          | 1.13648299 | 0.01258945 |
| ALKBH8     | 91801     | alkB homolog 8, tRNA methyltra    | 1.13110067 | 0.00828114 |
| FBXO25     | 26260     | F-box protein 25                  | 1.12463532 | 0.00204344 |
| CCL20      | 6364      | C-C motif chemokine ligand 20     | 1.12072856 | 0.00578861 |
| EXOSC8     | 11340     | exosome component 8               | 1.11117074 | 0.00293345 |
| FAM27E3    | 100131997 | family with sequence similarity 2 | 1.11018399 | 0.01252953 |
| CARS       | 833       | cysteine-lyl-RNA synthetase       | 1.10927755 | 0.00069814 |
| KCNIP3     | 30818     | potassium voltage-gated channel   | 1.10135956 | 0.03992953 |
| CASP5      | 838       | caspace 5                         | 1.08689223 | 0.03939784 |
| SNORD12C   | 26765     | small nucleolar RNA, C/D box 12   | 1.07786226 | 0.00090947 |
| ZNF25      | 219749    | zinc finger protein 25            | 1.07541485 | 0.0040642  |
| SCGN       | 10590     | secretagogin, EF-hand calcium b   | 1.0733444  | 0.00961469 |
| EPRS       | 2058      | glutamyl-prolyl-tRNA synthetase   | 1.07233582 | 0.00066341 |
| ZBTB10     | 65986     | zinc finger and BTB domain cont   | 1.07125462 | 0.00410122 |
| DSG3       | 1830      | desmoglein 3                      | 1.06518964 | 0.03190712 |
| NUDT19     | 390916    | nudix hydrolase 19                | 1.06432195 | 0.02077962 |
| WARS       | 7453      | tryptophanyl-tRNA synthetase      | 1.0604578  | 0.00136706 |
| THSD4      | 79875     | thrombospondin type 1 domain c    | 1.05967074 | 0.01428227 |
| METAP1D    | 254042    | methionyl aminopeptidase type     | 1.05720972 | 0.00475156 |
| CADPS      | 8618      | calcium dependent secretion act   | 1.04861745 | 0.00317002 |
| EPHB2      | 2048      | EPH receptor B2                   | 1.04827167 | 0.04952039 |
| TPD52L1    | 7164      | tumor protein D52 like 1          | 1.04530156 | 0.00273332 |
| MT1F       | 4494      | metallothionein 1F                | 1.04393992 | 0.00961469 |
| MAOA       | 4128      | monoamine oxidase A               | 1.02220766 | 0.02306633 |
| STGGALNAC3 | 256435    | ST6 N-acetylgalactosaminidase alp | 1.014046   | 0.01262385 |
| FCHSD2     | 9873      | FCH and double SH3 domains 2      | 1.01223421 | 0.01568881 |
| GP2        | 84706     | glutamic-pyruvic transaminase     | 1.01208169 | 0.00114511 |
| LINC01612  | 101928223 | long intergenic non-protein codin | 1.01114463 | 0.0264936  |
| PDGFA      | 5154      | platelet derived growth factor su | 1.0106597  | 0.00578988 |
| ARSE       | 415       | arylsulfatase E (chondrodysplasia | 1.01044394 | 0.02536567 |
| SH2B3      | 10019     | SH2B adaptor protein 3            | 1.00758288 | 0.00696825 |
| SNTB1      | 6641      | synthrophin beta 1                | 1.00701349 | 0.00578861 |
| PNPLA1     | 285848    | patatin like phospholipase dom    | 1.00643063 | 0.01780573 |
| PTPN14     | 5784      | protein tyrosine phosphatase, na  | 0.99668753 | 0.00038205 |
| SNORD50A   | 26799     | small nucleolar RNA, C/D box 50   | 0.99266132 | 0.0130601  |
| MAP2K5     | 5607      | mitogen-activated protein kinase  | 0.99111675 | 0.00089839 |
| CPA2       | 1358      | carboxypeptidase A2               | 0.98761245 | 0.03337349 |
| MOC51      | 4337      | molybdenum cofactor synthesis     | 0.98749824 | 0.00578988 |
| KLHL5      | 51088     | kelch like family member 5        | 0.98417659 | 0.01137687 |
| SESN2      | 83667     | sestrin 2                         | 0.98328674 | 0.00100837 |
| CCND2      | 894       | cyclin D2                         | 0.98236338 | 0.00054987 |
| KCNK15     | 60598     | potassium two pore domain cha     | 0.98160309 | 0.01790219 |
| CEP126     | 57562     | centrosomal protein 126           | 0.9798946  | 0.03985085 |
| SCRN1      | 9805      | secernin 1                        | 0.97928993 | 0.01045399 |
| BCAT1      | 586       | branched chain amino acid trans   | 0.9792507  | 0.03347772 |
| LDLRAD3    | 143458    | low density lipoprotein receptor  | 0.97910068 | 0.0046388  |
| GAS5       | 60674     | growth arrest specific 5 (non-pr  | 0.97870913 | 0.00114511 |
| LRRPRC     | 10128     | leucine rich pentaricopeptide re  | 0.97634592 | 0.00114511 |
| MOCOS      | 55034     | molybdenum cofactor sulfurase     | 0.97575628 | 0.00318161 |
| PRKAR1B    | 5575      | protein kinase cAMP-dependent     | 0.97575506 | 0.00189106 |
| PAPSS2     | 9060      | 3'-phosphoadenosine 5'-phosph     | 0.97318966 | 0.04303136 |
| ACKR4      | 51554     | atypical chemokine receptor 4     | 0.97241275 | 0.01048065 |
| ANO1       | 55107     | anoctamin 1                       | 0.97119961 | 0.00500975 |
| SNORD18A   | 677848    | small nucleolar RNA, C/D box 1A   | 0.96350387 | 0.00576562 |
| CLIC4      | 25932     | chloride intracellular channel 4  | 0.9621097  | 0.00273332 |
| PDE3B      | 5140      | phosphodiesterase 3B              | 0.95642141 | 0.01756491 |
| RHOQ       | 23433     | ras homolog family member Q       | 0.95588489 | 0.01522005 |
| PPP1R36    | 145376    | protein phosphatase 1 regulator   | 0.94892844 | 0.00915944 |
| EDA2R      | 60401     | ectodysplasin A2 receptor         | 0.94802775 | 0.01787727 |
| RIN3       | 79890     | Ras and Rab interactor 3          | 0.94491367 | 0.01627355 |
| DDIT4      | 54541     | DNA damage inducible transcript   | 0.93977453 | 0.00861386 |
| RASGRF2    | 59242     | Ras protein specific guanine nucl | 0.93860563 | 0.03021069 |
| WDR63      | 126820    | WD repeat domain 63               | 0.93769302 | 0.02997331 |
| FZD6       | 8323      | frizzled class receptor 6         | 0.93649769 | 0.03004045 |

|           |           |                                                |            |             |
|-----------|-----------|------------------------------------------------|------------|-------------|
| GSTM1     | 2944      | glutathione S-transferase mu 1                 | 1.2312683  | 7.58E-05    |
| GARS      | 2617      | glycyl-tRNA synthetase                         | 1.20923113 | 6.49E-05    |
| CXCL14    | 9547      | C-X-C motif chemokine ligand 14                | 1.20392719 | 0.00222437  |
| C3        | 718       | complement C3                                  | 1.20362162 | 0.00029253  |
| MTHFD1L   | 25902     | methylene tetrahydrofolate dehydrogenase       | 1.20193006 | 0.00024734  |
| EIF4EBP1  | 1978      | eukaryotic translation initiation factor 4E bi | 1.20100621 | 0.001042    |
| SLC1A5    | 6510      | solute carrier family 1 member 5               | 1.1951721  | 0.00041762  |
| TMEM150C  | 441027    | transmembrane protein 150C                     | 1.18358352 | 0.01684697  |
| TPD52L1   | 7164      | tumor protein D52 like 1                       | 1.18306205 | 0.00065434  |
| ASIC1     | 41        | acid sensing ion channel subunit 1             | 1.17932696 | 0.00178747  |
| VLDLR-AS1 | 401491    | VLDLR antisense RNA 1                          | 1.17570513 | 0.00481385  |
| GRIN2B    | 2904      | glutamate ionotropic receptor NMDA type 2      | 1.17350825 | 0.04555666  |
| YARS      | 8565      | tyrosyl-tRNA synthetase                        | 1.17193423 | 0.00043388  |
| WARS      | 7453      | tryptophanyl-tRNA synthetase                   | 1.17106554 | 0.00036503  |
| STK32A    | 202374    | serine/threonine kinase 32A                    | 1.16341082 | 0.01245643  |
| SLC7A2    | 6542      | solute carrier family 7 member 2               | 1.158475   | 0.001597283 |
| TRAF5     | 7188      | TNF receptor associated factor 5               | 1.15624667 | 0.00282706  |
| DRAM1     | 55332     | DNA damage regulated autophagy modul           | 1.14826813 | 0.00079302  |
| ADGRG1    | 9289      | adhesion G protein-coupled receptor G1         | 1.14969577 | 0.00044144  |
| SDC3      | 9672      | syndecan 3                                     | 1.13587272 | 0.00407527  |
| ZNF532    | 55205     | zinc finger protein 532                        | 1.12801006 | 0.03596635  |
| SLC14A    | 6509      | solute carrier family 1 member 4               | 1.12164701 | 0.00083444  |
| KRT73-AS1 | 100127967 | KRT73 antisense RNA 1                          | 1.12161614 | 0.00356874  |
| NFE2L3    | 9603      | nuclear factor, erythroid 2 like 3             | 1.11398307 | 0.00471369  |
| RIN3      | 79890     | Ras and Rab interactor 3                       | 1.10885609 | 0.00454239  |
| ALDH1B1   | 219       | aldehyde dehydrogenase 1 family member         | 1.10704803 | 0.00740245  |
| GSTM5     | 2949      | glutathione S-transferase mu 5                 | 1.10281642 | 0.0001413   |
| SNORD12C  | 26765     | small nucleolar RNA, C/D box 12C               | 1.09539694 | 0.00044144  |
| MAP2K6    | 5608      | mitogen-activated protein kinase kinase 6      | 1.09093531 | 0.00656663  |
| XPOT      | 11260     | exportin for tRNA                              | 1.08224953 | 0.00083444  |
| IRF8      | 3394      | interferon regulatory factor 8                 | 1.07971948 | 0.00062311  |
| HNRPNA1L2 | 144983    | heterogeneous nuclear ribonucleoprotein A      | 1.06848544 | 0.04556628  |
| CYP4F11   | 57834     | cytochrome P450 family 4 subfamily F mem       | 1.06347849 | 0.01565592  |
| FBXO25    | 26260     | F-box protein 25                               | 1.06131525 | 0.00165453  |
| EPRS      | 2058      | glutamyl-prolyl-tRNA synthetase                | 1.06119413 | 0.00039855  |
| DZIP1L    | 199221    | DAZ interacting zinc finger protein 1 like     | 1.0608734  | 0.02731519  |
| DOCK11    | 139818    | dedicator of cytokinesis 11                    | 1.06034522 | 0.03571338  |
| TAF4B     | 6875      | TATA-box binding protein associated factor     | 1.05977326 | 0.01374743  |
| RPS6KA2   | 6196</    |                                                |            |             |

|            |           |                                         |            |             |
|------------|-----------|-----------------------------------------|------------|-------------|
| FAM198B    | 51313     | family with sequence similarity 198 m   | -0.7241571 | 0.00860224  |
| ENOX2      | 10495     | ecto-NOX disulfide-thiol exchanger 2    | -0.7291533 | 0.035878    |
| AQP7       | 364       | aquaporin 7                             | -0.7326773 | 0.02631375  |
| LRPAP1     | 4043      | LDL receptor related protein associated | -0.7386115 | 0.00576376  |
| CHRAC1     | 54108     | chromatin accessibility complex 1       | -0.7394916 | 0.00514603  |
| TTFR       | 7276      | transferrin                             | -0.7395433 | 0.00788852  |
| GLRB       | 2743      | glycine receptor beta                   | -0.7403241 | 0.04823551  |
| TEX9       | 374618    | testis expressed 9                      | -0.7451101 | 0.04789339  |
| CPT1B      | 1375      | carnitine palmitoyltransferase 1B       | -0.7454951 | 0.04269821  |
| MT1M       | 4499      | metallothionein 1M                      | -0.7542781 | 0.04388234  |
| GNAX       | 2781      | G protein subunit alpha z               | -0.7599327 | 0.04245187  |
| NQO2       | 4835      | N-ribosyl-dihydrocinnonamide:quinone    | -0.7680005 | 0.00860224  |
| GLIPR1     | 11010     | GLI pathogenesis related 1              | -0.7696399 | 0.03300677  |
| SAPCD1-AS1 | 104413891 | SAPCD1 antisense RNA 1                  | -0.7824771 | 0.00578872  |
| ENPP7      | 339221    | ectonucleotide pyrophosphatase/phosph   | -0.7832326 | 0.014510983 |
| UNC93A     | 54346     | unc-93 homolog A                        | -0.7839681 | 0.01723965  |
| DDX11L2    | 84771     | DEAD/H-box helicase 11 like 2           | -0.7855532 | 0.04288551  |
| B3GNT7     | 93010     | UDP-GlcNAc:betaGal beta-1,3-N-acetyl    | -0.7932578 | 0.0033726   |
| CSF1       | 1435      | colony stimulating factor 1             | -0.7975355 | 0.00292153  |
| CATSPERB   | 79820     | cation channel sperm associated auxilli | -0.7994522 | 0.00158989  |
| MLNPL      | 51085     | MLX interacting protein like            | -0.7996988 | 0.04627729  |
| LINC00417  | 100874164 | long intergenic non-protein coding RNA  | -0.8064693 | 0.00643867  |
| FBXO27     | 126433    | F-box protein 27                        | -0.8125384 | 0.00573765  |
| LETM2      | 137994    | leucine zipper and EF-hand containing   | -0.8128154 | 0.02530861  |
| ADAM28     | 10863     | ADAM metalloproteinase domain 28        | -0.8185934 | 0.00204872  |
| DNAJ4      | 55466     | DnaJ heat shock protein family (Hsp40)  | -0.8193794 | 0.02382858  |
| SSTR1      | 6751      | somatostatin receptor 1                 | -0.8256895 | 0.00285547  |
| MIR3662    | 100500880 | microRNA 3662                           | -0.8292129 | 0.04890784  |
| ACC3       | 84680     | 1-aminocyclopropane-1-carboxylate synth | -0.8301623 | 0.02939543  |
| LCN2       | 3934      | lipocalin 2                             | -0.8321147 | 0.03396343  |
| KLK1       | 3816      | kallikrein 1                            | -0.8451087 | 0.0087324   |
| LINC01363  | 101928484 | long intergenic non-protein coding RNA  | -0.8459353 | 0.01966698  |
| NBP9F      | 400818    | NBPF member 9                           | -0.8524776 | 0.03598858  |
| POU2F3     | 25833     | POU class 2 homeobox 3                  | -0.8586509 | 0.01704716  |
| NBR2       | 10230     | neighbor of BRCA1 gene 2 (non-protein)  | -0.8668901 | 0.00175681  |
| CYP3A7     | 1551      | cytochrome P450 family 3 subfamily A    | -0.8727416 | 0.0307449   |
| TYGL       | 5836      | glycogen phosphorylase L                | -0.8800073 | 0.00723793  |
| TMEM253    | 643382    | transmembrane protein 253               | -0.8801948 | 0.00350706  |
| KCTD21-AS1 | 100289388 | KCTD21 antisense RNA 1                  | -0.8831598 | 0.00466717  |
| CAPN3      | 825       | calpain 3                               | -0.8837457 | 0.00761744  |
| REG3A      | 5068      | regenerating family member 3 alpha      | -0.8843374 | 0.0099524   |
| RCAN2      | 10231     | regulator of calcineurin 2              | -0.9025192 | 0.01424431  |
| XKR9       | 389668    | XK related 9                            | -0.9042769 | 0.01950239  |
| CYP4V2     | 285440    | cytochrome P450 family 4 subfamily V    | -0.9129285 | 0.00319437  |
| PRRT3-AS1  | 100874032 | PRRT3 antisense RNA 1                   | -0.9146809 | 0.00298835  |
| SNORD14A   | 26822     | small nucleolar RNA, C/D box 14A        | -0.9151929 | 0.00527243  |
| FAS        | 355       | Fas cell surface death receptor         | -0.9249071 | 0.00818411  |
| MIR487A    | 619555    | microRNA 487a                           | -0.925463  | 0.02364315  |
| CLU        | 1191      | clusterin                               | -0.9259675 | 0.02814819  |
| TPPP       | 11076     | tubulin polymerization promoting prote  | -0.9267572 | 0.00085403  |
| DHR57      | 51635     | dehydrogenase/reductase 7               | -0.9283408 | 0.00252983  |
| ST6GALNAC2 | 256435    | ST6 N-acetylgalactosaminide alpha-2,6   | -0.9301093 | 0.035878    |
| TAPBP1     | 55080     | TAP binding protein like                | -0.9329288 | 0.00512693  |
| NT5C3B     | 115024    | 5'-nucleotidase, cytosolic IIIb         | -0.9426682 | 0.00033023  |
| CLOCK      | 9575      | clock circadian regulator               | -0.9463106 | 0.04288541  |
| CLPTM1     | 1209      | CLPTM1, transmembrane protein           | -0.9471087 | 0.00319668  |
| SORD       | 6652      | sorbitol dehydrogenase                  | -0.9630053 | 0.00104966  |
| NABP1      | 64859     | nucleic acid binding protein 1          | -0.9717105 | 0.02380921  |
| PDPFR      | 55066     | pyruvate dehydrogenase phosphatase 5    | -0.9743154 | 0.00350706  |
| MT1A       | 4489      | metallothionein 1A                      | -0.9850724 | 0.04686783  |
| XKRX       | 402415    | XK related, X-linked                    | -0.9908661 | 0.01214527  |
| ZPLD1      | 131368    | zona pellucida like domain containing 1 | -0.9964158 | 0.0246736   |
| PIGR       | 5284      | polymeric immunoglobulin receptor       | -1.0028728 | 0.00030281  |
| HTR1D      | 3352      | 5-hydroxytryptamine receptor 1D         | -1.0083755 | 0.02814819  |
| ARSJ       | 79642     | arylsulfatase family member J           | -1.0196878 | 0.04197635  |
| MT1F       | 4494      | metallothionein 1F                      | -1.0232378 | 0.01896695  |
| MAF        | 4094      | MAF bZIP transcription factor           | -1.0271778 | 0.04565868  |
| PRSS2      | 5645      | serine protease 2                       | -1.0393026 | 0.00017095  |
| NPY4R      | 5540      | neuropeptide Y receptor Y4              | -1.0519103 | 0.00413421  |
| ST3GAL1    | 6482      | ST3 beta-galactoside alpha-2,3-sialyltr | -1.0623097 | 0.00104966  |
| TMEM229A   | 730130    | transmembrane protein 229A              | -1.0650344 | 0.04565868  |
| ADH6       | 130       | alcohol dehydrogenase 6 (class V)       | -1.0678659 | 0.00581797  |
| ZNF704     | 619279    | zinc finger protein 704                 | -1.0729972 | 0.00319437  |
| MT1H       | 4496      | metallothionein 1H                      | -1.0893761 | 0.02230624  |

|             |           |                                    |            |            |
|-------------|-----------|------------------------------------|------------|------------|
| PSD4        | 23550     | pleckstrin and Sec7 domain cont    | 0.93183896 | 0.01514225 |
| PITPNM3     | 83394     | PITPNM family member 3             | 0.92780961 | 0.00041406 |
| MT1M        | 4499      | metallothionein 1M                 | 0.9240359  | 0.00885861 |
| H6PD        | 9563      | hexose-6-phosphate dehydrogen      | 0.92307168 | 0.00389187 |
| BIRC3       | 330       | baculoviral IAP repeat containing  | 0.92033428 | 0.01288736 |
| LINC00266-1 | 140849    | long intergenic non-protein coding | 0.91906949 | 0.04010817 |
| LONRF1      | 91624     | LON peptidase N-terminal doma      | 0.91699924 | 0.00406827 |
| LARS        | 51520     | leucyl-tRNA synthetase             | 0.91447391 | 0.00083332 |
| ATP8A1      | 10396     | ATPase phospholipid transportin    | 0.91229747 | 0.00449329 |
| MT1H        | 4496      | metallothionein 1H                 | 0.91144795 | 0.02622626 |
| GSZT2       | 2954      | glutathione S-transferase zeta 1   | 0.90893457 | 0.00766691 |
| KIF21B      | 23046     | kinesin family member 21B          | 0.90624042 | 0.00204158 |
| G0S2        | 50486     | GO/G1 switch 2                     | 0.90417821 | 0.02282916 |
| SLC25A36    | 55186     | solute carrier family 25 member    | 0.90244343 | 0.01780573 |
| ANK1        | 2856      | ankyrin 1                          | 0.90203099 | 0.0083859  |
| AIFM2       | 84883     | apoptosis inducing factor, mitoch  | 0.89884674 | 0.00538163 |
| ATF4        | 468       | activating transcription factor 4  | 0.89734827 | 0.00068564 |
| NTRF3       | 4908      | neurotrophin 3                     | 0.89711572 | 0.02824866 |
| VWAA2       | 340706    | von Willebrand factor A domain     | 0.89129709 | 0.01328335 |
| IDH2        | 3418      | isocitrate dehydrogenase (NADP     | 0.88853456 | 0.00274473 |
| TARS        | 6897      | threonyl-tRNA synthetase           | 0.88516407 | 0.00353101 |
| MAT1A       | 4143      | methionine adenosyltransferase     | 0.88375693 | 0.01749727 |
| SERPIN8     | 5055      | serpin family B member 2           | 0.88363255 | 0.02495778 |
| LINC00886   | 730091    | long intergenic non-protein codin  | 0.88037601 | 0.01077355 |
| KBTD11-OT   | 104266957 | KBTD11 overlapping transcript      | 0.88018366 | 0.01189168 |
| SLC38A1     | 81639     | solute carrier family 38 member    | 0.8792529  | 0.00114511 |
| COX18       | 285521    | COX18, cytochrome c oxidase as     | 0.87746646 | 0.03791723 |
| WAC-AS1     | 220906    | WAC antisense RNA 1 (head to t     | 0.877381   | 0.01070603 |
| CDKL1       | 8814      | cyclin dependent kinase like 1     | 0.87661238 | 0.03024505 |
| LINC00909   | 400657    | long intergenic non-protein codin  | 0.87493049 | 0.01569705 |
| RPUSD4      | 84881     | RNA pseudouridylylase synthase d   | 0.87467156 | 0.01194033 |
| LRRIG1      | 84125     | leucine rich repeats and IQ motif  | 0.86770711 | 0.04077882 |
| FAM131B     | 9715      | family with sequence similarity 1  | 0.86750214 | 0.01176105 |
| HOMER2      | 9455      | homer scaffold protein 2           | 0.86154221 | 0.00285119 |
| NUDT3       | 11165     | nudix hydrolase 3                  | 0.8569471  | 0.00924523 |
| FASTKD2     | 22868     | FAST kinase domains 2              | 0.85658785 | 0.00475156 |
| JADE2       | 23338     | jade family PHD finger 2           | 0.85650601 | 0.01381932 |
| RORA        | 6095      | RAR related orphan receptor A      | 0.85280233 | 0.01477118 |
| ERP27       | 121506    | endoplasmic reticulum protein 2    | 0.84855923 | 0.00753522 |
| NFE2L3      | 9603      | nuclear factor, erythroid 2 like 3 | 0.84797808 | 0.02686928 |
| MT1E        | 4493      | metallothionein 1E                 | 0.84608667 | 0.02210353 |
| HSPA13      | 6782      | heat shock protein family A (Hsp   | 0.84471469 | 0.0020531  |
| ROB01       | 6091      | roundabout guidance receptor 1     | 0.84461946 | 0.00738307 |
| BUD31       | 8896      | BUD31 homolog                      | 0.84424345 | 0.00578988 |
| SULF2       | 55959     | sulfatase 2                        | 0.84180975 | 0.00731415 |
| JDP2        | 122953    | Jun dimerization protein 2         | 0.84034159 | 0.00181597 |
| NEDD4       | 4734      | neural precursor cell expressed, d | 0.8402335  | 0.03777574 |
| MARS        | 4141      | methionyl-tRNA synthetase          | 0.84017281 | 0.00164205 |
| PYROXD1     | 79912     | pyridine nucleotide-disulphide ox  | 0.84001517 | 0.02353273 |
| NR2P        | 8828      | neuroilin 2                        | 0.83969116 | 0.02812302 |
| PTPRG       | 5793      | protein tyrosine phosphatase, re   | 0.83853776 | 0.01993575 |
| MT1G        | 4495      | metallothionein 1G                 | 0.83774771 | 0.0357167  |
| DRAM1       | 55332     | DNA damage regulated autophag      | 0.83769827 | 0.00915219 |
| APOL6       | 80830     | apolipoprotein L6                  | 0.83671487 | 0.00578861 |
| MPP6        | 51678     | membrane palmitoylated protei      | 0.83523276 | 0.01477118 |
| NFIC        | 41628     | nuclear factor I C                 | 0.83319168 | 0.00157199 |
| CASC1       | 55259     | cancer susceptibility 1            | 0.83095741 | 0.03739957 |
| FKTN        | 2218      | fukutin                            | 0.82932817 | 0.02210353 |
| ALDH1B1     | 219       | aldehyde dehydrogenase 1 famil     | 0.82930015 | 0.03873331 |
| MYO10       | 4651      | myosin X                           | 0.82898282 | 0.00684957 |
| ERN1        | 2081      | endoplasmic reticulum to nucleu    | 0.82700792 | 0.01002957 |
| HKDC1       | 80201     | hexokinase domain containing 1     | 0.82518843 | 0.00274473 |
| PYCR1       | 5831      | pyrroline-5-carboxylate reductas   | 0.8245891  | 0.00353101 |
| ZNF618      | 114991    | zinc finger protein 618            | 0.82425081 | 0.01250152 |
| CIB2        | 10518     | calcium and integrin binding fam   | 0.82244189 | 0.00850555 |
| LONP1       | 9361      | lon peptidase 1, mitochondrial     | 0.82015022 | 0.01077355 |
| RASGRP1     | 10125     | RAS guanyl releasing protein 1     | 0.818889   | 0.01175754 |
| RPS6KA2     | 6196      | ribosomal protein S6 kinase A2     | 0.81862044 | 0.01787183 |
| DYNC1H1     | 1778      | dynein cytoplasmic 1 heavy chain   | 0.81730375 | 0.01317843 |
| CRYL1       | 51084     | crystallin lambda 1                | 0.81712075 | 0.02286197 |
| PCCA        | 5095      | propionyl-CoA carboxylase alpha    | 0.81685304 | 0.00766691 |
| MTLLB       | 79828     | methyltransferase like 8           | 0.81446819 | 0.00645954 |
| TGM2        | 7052      | transglutaminase 2                 | 0.81347962 | 0.02437293 |
| CCPG1       | 9236      | cell cycle progression 1           | 0.81318996 | 0.01395726 |

|          |        |                                              |            |            |
|----------|--------|----------------------------------------------|------------|------------|
| MYO1B    | 4430   | myosin IB                                    | 0.94502292 | 0.00553008 |
| CACNA2D3 | 55799  | calcium voltage-gated channel auxilliary sub | 0.94350044 | 0.01494909 |
| VWAA2    | 340706 | von Willebrand factor A domain containing    | 0.94304236 | 0.00649818 |
| FHL3     | 2275   | four and a half LIM domains 3                | 0.94002158 | 0.02705905 |
| SERPIN7  | 8710   | serpin family B member 7                     | 0.93858672 | 0.01138615 |
| ZMA13    | 64393  | zinc finger matrix-type 3                    | 0.93851217 | 0.00127925 |
| CXCL1    | 2919   | C-X-C motif chemokine ligand 1               | 0.93478563 | 0.00185005 |
| BMP4     | 652    | bone morphogenetic protein 4                 | 0.93295304 | 0.01137402 |
| ARSE     | 415    | arylsulfatase E (chondrodysplasia punctata   | 0.93287318 | 0.02818604 |
| ROBO1    | 6091   | roundabout guidance receptor 1               | 0.92379346 | 0.00256563 |
| MDM2     | 4193   | MDM2 proto-oncogene                          | 0.92257009 | 0.00068044 |
| HSPA12A  | 259217 | heat shock protein family A (Hsp70) memba    | 0.92219955 | 0.00521077 |
| TBC1D19  | 55296  | TBC1 domain family member 19                 | 0.92035134 | 0.0027805  |
| TP53     | 7157   | tumor protein p53                            | 0.91758067 | 0.00063291 |
| ZC3H12C  | 85463  | zinc finger CCH-type containing 12C          | 0.91594485 | 0.00112841 |
| DC1A     | 196513 | decapping mRNA 1B                            | 0.91516526 | 0.00215339 |
| CLTA     | 4261   | class II major histocompatibility complex tr | 0.91056655 | 0.0009134  |
| LRIG1    | 26018  | leucine rich repeats and immunoglobulin lik  | 0.90888011 | 0.03705209 |
| CD74     | 972    | CD74 molecule                                | 0.90870605 | 0.00386342 |
| SLC3A2   | 6520   | solute carrier family 3 member 2             | 0.90797936 | 0.00119722 |
| SEMA3C   | 10512  | semaphorin 3C                                | 0.90588728 | 0.00944718 |
| SLC7A1   | 6541   | solute carrier family 7 member 1             | 0.90548153 | 0.00251212 |
| LARS     | 51520  | leucyl-tRNA synthetase                       | 0.90403074 | 0.00050772 |
| HIF1A    | 3091   | hypoxia inducible factor 1 alpha subunit     | 0.90359028 | 0.00190252 |
| SHMT2    | 6472   | serine hydroxymethyltransferase 2            | 0.90354266 | 0.0018911  |
| ZNF618   | 114991 | zinc finger protein 618                      | 0.90023011 | 0.00487858 |
| RHOQ     | 23433  | ras homology family member Q                 | 0.89770085 | 0.0151941  |
| MAGED1   | 9500   | MAGE family member D1                        | 0.89759588 | 0.02756235 |
| PTCD3    | 55037  | pentatricopeptide repeat domain 3            | 0.89732389 | 0.01722169 |
| KCNQ1    | 3784   | potassium voltage-gated channel subfamily    | 0.89654886 | 0.0010954  |
| ERN2     | 10595  | endoplasmic reticulum to nucleus signaling   | 0.89605472 | 0.00081817 |
| LTB      | 4050   | lymphotaxin beta                             | 0.89558445 | 0.00261263 |
| CN2D     | 894    | cyclin D2                                    | 0.89248975 | 0.00062963 |
| UBE2Q2   | 92912  | ubiquitin conjugating enzyme E2 Q2           | 0.89003518 | 0.0114678  |
| CEP57    | 9702   | centrosomal protein 57                       | 0.88707109 | 0.004053   |
| APBB2    | 323    | amyloid beta precursor protein binding fam   | 0.8859306  | 0.00427446 |
| PCDHGC3  | 5098   | protocadherin gamma subfamily C              | 0.87559276 | 0.00340751 |
| PIGR     | 5284   | polymeric immunoglobulin receptor            | 0.87207396 | 0.00039468 |
| RGMB-AS1 | 503569 | RGMB antisense RNA 1                         | 0.87178199 | 0.04727269 |
| CARD16   | 114769 | caspase recruitment domain family membe      | 0.86903535 |            |

|          |           |                                         |            |            |
|----------|-----------|-----------------------------------------|------------|------------|
| SLCSA1   | 6523      | solute carrier family 5 member 1        | -1.0929192 | 0.02572743 |
| DEPDC4   | 120863    | DEP domain containing 4                 | -1.0957499 | 0.04789339 |
| BCL2L14  | 79370     | BCL2 like 14                            | -1.0958644 | 4.86E-05   |
| ASA2B    | 653308    | N-acylsphingosine amidohydrolase 2B     | -1.1022943 | 0.01417659 |
| XRRA1    | 143570    | X-ray radiation resistance associated 1 | -1.1067407 | 0.0034493  |
| CHAD     | 1101      | chondroadherin                          | -1.1109076 | 0.00430211 |
| CFTR     | 1080      | cystic fibrosis transmembrane conduct   | -1.1110544 | 0.01933317 |
| MYO7B    | 4648      | myosin VIIb                             | -1.1112777 | 0.01303449 |
| PDE3B    | 5140      | phosphodiesterase 3B                    | -1.1145466 | 0.01431889 |
| SEMG1    | 6406      | semenogelin 1                           | -1.1162015 | 0.0298835  |
| HLA-DPA1 | 3113      | major histocompatibility complex, class | -1.123075  | 0.01214527 |
| SOX6     | 5553      | SRY-box 6                               | -1.1242668 | 0.04686783 |
| MAN1A1   | 4121      | mannosidase alpha class 1A member 3     | -1.1275669 | 0.00120433 |
| MS4A8    | 83661     | membrane spanning 4-domains A8          | -1.1312032 | 0.01120699 |
| MT1B     | 4490      | metallothionein 1B                      | -1.1458125 | 0.0270896  |
| FAM3B    | 54097     | family with sequence similarity 3 mem   | -1.1711542 | 0.0029489  |
| ITLN1    | 55600     | intelectin 1                            | -1.1869924 | 0.00627113 |
| MST1L    | 11223     | macrophage stimulating 1 like           | -1.1967782 | 0.00047264 |
| MTTP     | 4547      | microsomal triglyceride transfer protei | -1.2022836 | 0.0357315  |
| QKI      | 9444      | QKI, KH domain containing RNA bindin    | -1.2102905 | 0.00014807 |
| PLA2G7   | 7941      | phospholipase A2 group VII              | -1.2112852 | 0.035878   |
| PPARGC1A | 10891     | PPARG coactivator 1 alpha               | -1.2266074 | 0.01966968 |
| HABP2    | 3026      | hyaluronan binding protein 2            | -1.2551966 | 0.02359651 |
| MT2A     | 4502      | metallothionein 2A                      | -1.2791889 | 0.01507643 |
| GC       | 2638      | GC, vitamin D binding protein           | -1.3066747 | 0.00632075 |
| MIR4653  | 100616117 | microRNA 4653                           | -1.3345083 | 0.00088552 |
| MOCOS    | 55034     | molybdenum cofactor sulfurase           | -1.370338  | 0.00035063 |
| ASA2H    | 56624     | N-acylsphingosine amidohydrolase 2      | -1.3786735 | 0.01704716 |
| MITF     | 4286      | melanogenesis associated transcriptio   | -1.3913143 | 0.00047264 |
| GABRE    | 2564      | gamma-aminobutyric acid type A rece     | -1.4121293 | 0.01876271 |
| SLC19A3  | 80704     | solute carrier family 19 member 3       | -1.4214145 | 0.01876271 |
| CFI      | 3426      | complement factor I                     | -1.4257336 | 0.01027145 |
| APOB     | 338       | apolipoprotein B                        | -1.4282766 | 0.04164816 |
| DPP4     | 1803      | dipeptidyl peptidase 4                  | -1.4732159 | 0.01703235 |
| TLR6     | 10333     | toll like receptor 6                    | -1.4917205 | 0.00384047 |
| MIR221   | 407006    | microRNA 221                            | -1.4993994 | 0.04688034 |
| ADGRL2   | 23266     | adhesion G protein-coupled receptor L   | -1.5176201 | 0.00147349 |
| BBOF1    | 80127     | basal body organization factor 1        | -1.5298209 | 0.0002455  |
| ANXA13   | 312       | annexin A13                             | -1.5372503 | 0.00067867 |
| ENTPD5   | 957       | ectonucleoside triphosphate diphosph    | -1.5392904 | 0.00078564 |
| ZC3H12C  | 85463     | zinc finger CCHH-type containing 12C    | -1.5476016 | 5.31E-05   |
| DSEL     | 92126     | dermatan sulfate epimerase like         | -1.5854592 | 0.00648883 |
| F11      | 2160      | coagulation factor XI                   | -1.6292778 | 0.00384047 |
| RGPD1    | 400956    | RANBP2-like and GRIP domain contain     | -1.6930974 | 0.00319437 |
| TINAG    | 27283     | tubulointerstitial nephritis antigen    | -1.7016638 | 0.02530861 |
| DCLC2    | 166614    | doublecortin like kinase 2              | -1.7816778 | 0.02231447 |
| CRACR2A  | 84766     | calcium release activated channel regu  | -1.8060397 | 7.42E-05   |
| IFI16    | 3428      | interferon gamma inducible protein 16   | -1.8304287 | 0.00026554 |
| DAB2     | 1601      | DAB2, clathrin adaptor protein          | -1.8530388 | 0.00035298 |
| NMFP7    | 4316      | matrix metalloproteinase 7              | -1.9383093 | 0.00636817 |
| MUCOLN3  | 55283     | muclolin 3                              | -1.974876  | 0.02677005 |
| MSMB     | 4477      | microseminoprotein beta                 | -2.049306  | 0.00095814 |
| EPB41L3  | 23136     | erythrocyte membrane protein band 4     | -2.0985123 | 0.00744709 |
| TMEM220  | 388335    | transmembrane protein 220               | -2.10351   | 0.00022077 |
| GSTM3    | 2947      | glutathione S-transferase mu 3          | -2.130355  | 8.13E-05   |
| KCNJ13   | 3769      | potassium voltage-gated channel subf    | -2.1787941 | 0.00204872 |
| TCN1     | 6947      | transcobalamin 1                        | -2.1960233 | 0.00088552 |
| BST1     | 683       | bone marrow stromal cell antigen 1      | -2.2918998 | 0.00067832 |
| CACNA2D1 | 781       | calcium voltage-gated channel auxilia   | -2.307905  | 7.42E-05   |
| MATN2    | 4147      | matrin 2                                | -2.4853764 | 3.97E-06   |
| SULT2A1  | 6822      | sulfotransferase family 2A member 1     | -2.5785729 | 0.00319437 |
| OCL5     | 6374      | C-X-C motif chemokine ligand 5          | -2.586426  | 3.65E-05   |
| CLCA1    | 1179      | chloride channel accessory 1            | -2.6038289 | 0.0039952  |
| CLDN10   | 9071      | claudin 10                              | -3.0859619 | 0.00022215 |
| RGPD2    | 729857    | RANBP2-like and GRIP domain contain     | -3.33129   | 2.87E-06   |
| VNN1     | 8876      | vanin 1                                 | -3.6155352 | 7.42E-05   |
| MME      | 4311      | membrane metalloendopeptidase           | -3.9127912 | 7.42E-05   |
| CYP4F11  | 57834     | cytochrome P450 family 4 subfamily F    | -5.282361  | 9.40E-08   |

|             |           |                                    |            |            |
|-------------|-----------|------------------------------------|------------|------------|
| GRPEL2      | 134266    | GrpE like 2, mitochondrial         | 0.81271828 | 0.00352094 |
| TUBE1       | 51175     | tubulin epsilon 1                  | 0.8126797  | 0.02896774 |
| ZHX2        | 22882     | zinc fingers and homeoboxes 2      | 0.81234536 | 0.01360211 |
| ZBTB37      | 84614     | zinc finger and BTB domain cont    | 0.8121692  | 0.01045399 |
| TIMM44      | 10469     | translocase of inner mitochondri   | 0.81106584 | 0.00721138 |
| AGMAT       | 79814     | agmatinase                         | 0.80956522 | 0.00318161 |
| ZFP69B      | 65243     | ZFP69 zinc finger protein B        | 0.80832831 | 0.01209222 |
| TRHDE       | 29953     | thyrotropin releasing hormone d    | 0.80446091 | 0.04446091 |
| SLFN5       | 162394    | schlafen family member 5           | 0.8056256  | 0.01375796 |
| OR14C36     | 127066    | olfactory receptor family 14 subf  | 0.80533954 | 0.03640358 |
| PIM1        | 5292      | Pim-1 proto-oncogene, serine/th    | 0.80466069 | 0.01152192 |
| PADI2       | 11240     | peptidyl arginine deiminase 2      | 0.80409713 | 0.03739957 |
| LOXL1       | 4016      | lysyl oxidase like 1               | 0.80294588 | 0.03650166 |
| RAB15       | 376267    | RAB15, member RAS oncogene f       | 0.80290768 | 0.00334678 |
| TCP11L2     | 255394    | t-complex 11 like 2                | 0.80130852 | 0.02438117 |
| ANKRD6      | 22881     | ankyrin repeat domain 6            | 0.80023693 | 0.01855795 |
| RAP1GAP2    | 23108     | RAP1 GTPase activating protein     | 0.79931757 | 0.00186408 |
| ZNF425      | 155054    | zinc finger protein 425            | 0.79803189 | 0.03798587 |
| ITC398      | 158219    | tetratricopeptide repeat domain    | 0.79703568 | 0.00961469 |
| IGFBP1      | 3484      | insulin like growth factor binding | 0.79267923 | 0.01330834 |
| SLC7A11-AS1 | 641364    | SLC7A11 antisense RNA 1            | 0.79223946 | 0.02114272 |
| CDX1        | 1044      | caudal type homeobox 1             | 0.79187896 | 0.00502693 |
| PP1L3       | 53938     | peptidylprolyl isomerase like 3    | 0.79186407 | 0.00114511 |
| ANKRD29     | 147463    | ankyrin repeat domain 29           | 0.79080629 | 0.01868408 |
| YARS2       | 51067     | tyrosyl-tRNA synthetase 2          | 0.7907692  | 0.01225833 |
| ZNF566      | 84924     | zinc finger protein 566            | 0.79021742 | 0.03257593 |
| PTPRM       | 5797      | protein tyrosine phosphatase, re   | 0.79005642 | 0.03112259 |
| NDUFA4L2    | 56901     | NDUFA4, mitochondrial complex      | 0.78835711 | 0.0053669  |
| CDYL2       | 124359    | chromodomain Y like 2              | 0.78760186 | 0.00508418 |
| ADGRG1      | 9289      | adhesion G protein-coupled rece    | 0.78571578 | 0.00857319 |
| ASIC1       | 41        | acid sensing ion channel subunit   | 0.78348432 | 0.02439953 |
| VWA8        | 23078     | von Willebrand factor A domain     | 0.7833225  | 0.00213881 |
| CBX4        | 83075     | chromobox 4                        | 0.78323454 | 0.00824841 |
| DNASE2      | 1777      | deoxyribonuclease 2, lysosomal     | 0.78096    | 0.00347115 |
| EXOSC5      | 56915     | exosome component 5                | 0.78079378 | 0.01920852 |
| CKAP4       | 10970     | cytoskeleton associated protein 4  | 0.78041049 | 0.01045399 |
| DHX3        | 56919     | DEAH-box helicase 33               | 0.77971694 | 0.01077355 |
| LONRF3      | 79836     | LON peptidase N-terminal doma      | 0.77901134 | 0.02335221 |
| RNF217      | 154214    | ring finger protein 217            | 0.77854237 | 0.02078528 |
| SRD5A1      | 6715      | steroid 5 alpha-reductase 1        | 0.77830051 | 0.00824841 |
| MIR548Y     | 100500919 | microRNA 548y                      | 0.77818609 | 0.02014679 |
| HBEFG       | 1839      | heparin binding EGF like growth    | 0.77678622 | 0.01424078 |
| CSE1        | 1435      | colony stimulating factor 1        | 0.7763415  | 0.00238927 |
| DNAI3       | 9093      | DnaJ heat shock protein family 1   | 0.77488814 | 0.00177634 |
| PRKCB       | 5579      | protein kinase C beta              | 0.77472743 | 0.02144448 |
| INSL6       | 11172     | insulin like 6                     | 0.77377091 | 0.02930689 |
| TMEM182     | 130827    | transmembrane protein 182          | 0.7721357  | 0.00611026 |
| PTGES3L-AA1 | 100885850 | PTGES3L-AA1RSD1 readthrough        | 0.77170107 | 0.03044696 |
| PLAU        | 5328      | plasminogen activator, urokinase   | 0.77096993 | 0.00553995 |
| TBF2M       | 64216     | transcription factor B2, mitochor  | 0.76929809 | 0.00353101 |
| AKAP7       | 9465      | A-kinase anchoring protein 7       | 0.76910644 | 0.0135338  |
| TMEM156     | 80008     | transmembrane protein 156          | 0.76821054 | 0.02439953 |
| KBTBD11     | 9920      | kelch repeat and BTB domain con    | 0.76601296 | 0.02759414 |
| PRMT3       | 10196     | protein arginine methyltransfera   | 0.76542867 | 0.04004042 |
| SOAT1       | 6646      | sterol O-acyltransferase 1         | 0.76525144 | 0.02014679 |
| PSPH        | 5723      | phosphoserine phosphatase          | 0.76505398 | 0.01318555 |
| ZMAT3       | 64393     | zinc finger matrix-type 3          | 0.76490402 | 0.00768409 |
| QRSL1       | 55278     | glutaminyl-tRNA synthase [gluta    | 0.76305448 | 0.00496767 |
| GGACT       | 87769     | gamma-glutamylamine cyclotran      | 0.76298395 | 0.01288736 |
| GABCA1      | 154664    | ATP binding cassette subfamily A   | 0.76218764 | 0.02106641 |
| E2F5        | 1875      | E2F transcription factor 5         | 0.76217446 | 0.00620708 |
| TCEA3       | 6920      | transcription elongation factor A  | 0.76186881 | 0.00738307 |
| PLEC        | 5339      | plectin                            | 0.76099166 | 0.03305594 |
| PADI4       | 23569     | peptidyl arginine deiminase 4      | 0.76044027 | 0.03992953 |
| FAM129A     | 116496    | family with sequence similarity 2  | 0.76042396 | 0.01535683 |
| APLF        | 200558    | aplatxin and PNKP like factor      | 0.7583103  | 0.00578988 |
| DCDC2       | 51473     | doublecortin domain containing     | 0.75745892 | 0.03669796 |
| PRKDC       | 5591      | protein kinase, DNA-activated, c   | 0.75715098 | 0.01253396 |
| GAB2        | 9846      | GRB2 associated binding protein    | 0.75653781 | 0.03202817 |
| KLNL        | 100144748 | killin, p53 regulated DNA replica  | 0.75451926 | 0.02211568 |
| MR1         | 3140      | major histocompatibility complex   | 0.75417722 | 0.00526073 |
| LRRC31      | 79782     | leucine rich repeat containing 31  | 0.75411557 | 0.0095712  |
| CRNDE       | 643911    | colorectal neoplasia differentia   | 0.75343648 | 0.03044696 |
| HERPUD1     | 9709      | homocysteine inducible ER prote    | 0.75280524 | 0.00213615 |

|            |        |                                                |            |            |
|------------|--------|------------------------------------------------|------------|------------|
| DLGAP1-AS2 | 84777  | DLGAP1 antisense RNA 2                         | 0.82551896 | 0.00949621 |
| ENAH       | 55740  | ENAH, actin regulator                          | 0.82461093 | 0.00336054 |
| VSTM5      | 387804 | V-set and transmembrane domain contain         | 0.82159367 | 0.00251694 |
| ZNF391     | 346157 | zinc finger protein 391                        | 0.82153339 | 0.04424537 |
| NPL        | 80896  | N-acetylneuraminyl pyruvate lyase              | 0.82108546 | 0.03393019 |
| EIF3L      | 51386  | eukaryotic translation initiation factor 3 sub | 0.81981581 | 0.00404372 |
| ZHX2       | 22882  | zinc fingers and homeoboxes 2                  | 0.81884945 | 0.00906551 |
| SLC12A2    | 6558   | solute carrier family 12 member 2              | 0.81590439 | 0.01877047 |
| WAC-AS1    | 220906 | WAC antisense RNA 1 (head to head)             | 0.81287441 | 0.01062257 |
| ZNF827     | 152485 | zinc finger protein 827                        | 0.81258219 | 0.0048841  |
| LRRNA      | 164312 | leucine rich repeat neuronal 4                 | 0.81226521 | 0.00108344 |
| NFIX       | 4784   | nuclear factor IX                              | 0.81097981 | 0.00188993 |
| TTC39C     | 125488 | tetratricopeptide repeat domain 39C            | 0.81076337 | 0.03133    |
| KCNNA4     | 3783   | potassium calcium-activated channel subfa      | 0.80712382 | 0.0056327  |
| MCF2L      | 23263  | MCF 2 cell line derived transforming sequer    | 0.80668571 | 0.00316067 |
| AARS       | 16     | alanyl-tRNA synthetase                         | 0.8062457  | 0.00248926 |
| PVT1       | 5820   | Pvt1 oncogene (non-protein coding)             | 0.80581031 | 0.03375477 |
| FLRT3      | 23767  | fibronectin leucine rich transmembrane pro     | 0.80253073 | 0.00831486 |
| PITPNP1    | 26207  | phosphatidylinositol transfer protein cytopla  | 0.79895033 | 0.01611121 |
| CALB2      | 794    | calbindin 2                                    | 0.79890561 | 0.03098601 |
| GSAP       | 54103  | gamma-secretase activating protein             | 0.79767512 | 0.00505435 |
| TNFSF12-TN | 407977 | TNFSF12-TNFSF13 readthrough                    | 0.79740021 | 0.00112027 |
| UBE2E2     | 7325   | ubiquitin conjugating enzyme E2 E2             | 0.7973506  | 0.00386342 |
| NOB1       | 28987  | NIN1 (RPN12) binding protein 1 homolog         | 0.79721166 | 0.00165149 |
| REV3L      | 5980   | REV3 like, DNA directed polymerase zeta ca     | 0.7971538  | 0.00481385 |
| GPC4       | 2239   | glypican 4                                     | 0.79652508 | 0.03908079 |
| PSPH       | 5723   | phosphoserine phosphatase                      | 0.79619609 | 0.00707865 |
| CDK6       | 1021   | cyclin dependent kinase 6                      | 0.79610633 | 0.004053   |
| ULBP3      | 79465  | UL16 binding protein 3                         | 0.79406697 | 0.01945689 |
| ZC3H12A    | 80149  | zinc finger CCHH-type containing 12A           | 0.79454613 | 0.00227777 |
| ASAP1      | 58087  | ArfGAP with SH3 domain, ankyrin repeat ar      | 0.79434397 | 0.01729513 |
| MCC2C      | 64087  | methylcrotonoyl-CoA carboxylase 2              | 0.79395132 | 0.00404372 |
| TNFSF13    | 8741   | TNF superfamily member 13                      | 0.79367824 | 0.00127925 |
| DNMT3B     | 1789   | DNA methyltransferase 3 beta                   | 0.78916903 | 0.01644933 |
| PARP15     | 165631 | poly(ADP-ribose) polymerase family membe       | 0.78877236 | 0.02506923 |
| ZNF25      | 219749 | zinc finger protein 25                         | 0.78697216 | 0.01431609 |
| PRPF40B    | 25766  | pre-mRNA processing factor 40 homolog B        | 0.78484738 | 0.01139366 |
| COLCA2     | 120376 | colorectal cancer associated 2                 | 0.78194549 | 0.00373215 |
| PTPRM      | 5797   | protein tyrosine phosphatase, receptor ty      | 0.78077388 | 0.02604542 |
| ASS1       | 445    | argininosuccinate synthase 1                   | 0.78018027 | 0.00135158 |
| GCKR       | 2646   | glucokinase regulator                          | 0.77957488 | 0.01767177 |
| SPATA18    | 132671 | spermatogenesis associated 18                  | 0.77826085 | 0.00080724 |
| APOBEC3C   | 27350  | apolipoprotein B mRNA editing enzyme cat       | 0.7779163  | 0.00380658 |
| EFNA5      | 1946   | efrin A5                                       | 0.77711045 | 0.00655449 |
| KIF26B     | 55083  | kinesin family member 26B                      | 0.77594077 | 0.01917458 |
| DRD1       | 1812   | dopamine receptor D1                           | 0.77466625 | 0.02783437 |
|            |        |                                                |            |            |

|            |           |                                     |            |            |
|------------|-----------|-------------------------------------|------------|------------|
| ABCA1      | 19        | ATP binding cassette subfamily A    | 0.75268937 | 0.01818588 |
| DEPTOR     | 64798     | DEP domain containing MTOR in       | 0.75176622 | 0.00796029 |
| AKR1C2     | 1646      | aldo-keto reductase family 1 me     | 0.75162289 | 0.04446091 |
| SLC25A43   | 203427    | solute carrier family 25 member     | 0.75130352 | 0.01249066 |
| RHOBTB3    | 22836     | Rho related BTB domain contain      | 0.7508895  | 0.03294735 |
| CD22       | 933       | CD22 molecule                       | 0.7505902  | 0.0385069  |
| UBE2E2     | 7325      | ubiquitin conjugating enzyme E2     | 0.74910098 | 0.0089459  |
| DBNDD2     | 55861     | dysbindin domain containing 2       | 0.7490577  | 0.00701598 |
| PRDM1      | 639       | PR/SET domain 1                     | 0.74841263 | 0.01915875 |
| KIZ        | 55857     | kizuna centrosomal protein          | 0.74833644 | 0.03330983 |
| MT1X       | 4501      | metallothionein 1X                  | 0.74680743 | 0.00836144 |
| PRKCH      | 5583      | protein kinase C eta                | 0.746354   | 0.02014679 |
| TRIAPI1    | 51499     | TP53 regulated inhibitor of apop    | 0.74622205 | 0.01262385 |
| GYG2       | 8908      | glycogenin 2                        | 0.74598494 | 0.00836144 |
| TRAPPC2L   | 51693     | trafficking protein particle comp   | 0.74559967 | 0.02434502 |
| TP53       | 7157      | tumor protein p53                   | 0.74204019 | 0.00463362 |
| RNF180     | 285671    | ring finger protein 180             | 0.74079045 | 0.00553995 |
| HLCS       | 3141      | holocarboxylase synthetase          | 0.73960971 | 0.00836144 |
| PIK3R1     | 5295      | phosphoinositide-3-kinase regula    | 0.73890233 | 0.00526073 |
| SLC25A10   | 1468      | solute carrier family 25 member     | 0.73715199 | 0.00445433 |
| PMAIP1     | 5366      | phorbol-12-myristate-13-acetate     | 0.73690376 | 0.0317179  |
| MRPL40     | 64976     | mitochondrial ribosomal protein     | 0.73456316 | 0.01189168 |
| TNFRSF10D  | 8793      | TNF receptor superfamily memb       | 0.7330767  | 0.01176105 |
| FAM84B     | 157638    | family with sequence similarity 4   | 0.72968687 | 0.01194033 |
| CCND2-AS1  | 103752584 | CCND2 antisense RNA 1               | 0.7295872  | 0.01428227 |
| HSPA9      | 3313      | heat shock protein family A (Hsp    | 0.72933383 | 0.00238505 |
| CHCHD4     | 131474    | coiled-coil-helix-coiled-coil-helix | 0.72918587 | 0.00843853 |
| CEBPG      | 1054      | CCAAT enhancer binding protein      | 0.72751652 | 0.01176105 |
| UTP20      | 27340     | UTP20, small subunit processom      | 0.72618243 | 0.04785988 |
| R3HDM2     | 22864     | R3H domain containing 2             | 0.72465781 | 0.00774445 |
| ERAP2      | 64167     | endoplasmic reticulum aminope       | 0.72315998 | 0.01146655 |
| TANC2      | 26115     | tetratricopeptide repeat, ankyrin   | 0.72215987 | 0.01993575 |
| ZZZ3       | 26009     | zinc finger ZZ-type containing 3    | 0.7207009  | 0.01330834 |
| NOX1       | 27035     | NADPH oxidase 1                     | 0.72011942 | 0.0135338  |
| SENP8      | 123228    | SUMO peptidase family member        | 0.71935227 | 0.03478557 |
| CCDC51     | 79714     | coiled-coil domain containing 51    | 0.71791104 | 0.00429197 |
| SUPV3L1    | 6832      | Suv3 like RNA helicase              | 0.71731028 | 0.00285119 |
| NEK3       | 4752      | NIMA related kinase 3               | 0.71696256 | 0.02227439 |
| NPRL3      | 8131      | NPR3 like, GATOR1 complex sub       | 0.71543494 | 0.01194033 |
| ARHGEF10L  | 55160     | Rho guanine nucleotide exchang      | 0.71416707 | 0.0088443  |
| CCNB1IP1   | 57820     | cyclin B1 interacting protein 1     | 0.71366856 | 0.01818588 |
| KLHL8      | 57563     | kelch like family member 8          | 0.71264115 | 0.01278099 |
| ZC3H6      | 376940    | zinc finger CCHC-type containin     | 0.71240972 | 0.01721836 |
| TNRC6C-AS1 | 100131096 | TNRC6C antisense RNA 1              | 0.7098267  | 0.03255531 |
| ZMYND12    | 84217     | zinc finger MYND-type containin     | 0.70963531 | 0.01143723 |
| SNORA84    | 100124534 | small nucleolar RNA, H/ACA box      | 0.70805608 | 0.00500975 |
| SLC7A6     | 9057      | solute carrier family 7 member 6    | 0.70782464 | 0.03236057 |
| TTCT2      | 55622     | tetratricopeptide repeat domain     | 0.70761394 | 0.0338229  |
| GFM1       | 85476     | G elongation factor mitochondri     | 0.7070175  | 0.0089459  |
| SPIRE1     | 56907     | spire type actin nucleation facto   | 0.70691863 | 0.02824866 |
| RASL11A    | 387496    | RAS like family 11 member A         | 0.70606126 | 0.02287055 |
| PIGL       | 9487      | phosphatidylinositol glycan anch    | 0.7042721  | 0.02851726 |
| GSTM5      | 2949      | glutathione S-transferase mu 5      | 0.70337974 | 0.00571217 |
| ZSWIM7     | 125150    | zinc finger SWIM-type containin     | 0.70337411 | 0.0089459  |
| LAMC1      | 3915      | laminin subunit gamma 1             | 0.70277588 | 0.0252848  |
| THEM4      | 117145    | thioesterase superfamily memb       | 0.70272465 | 0.00768409 |
| AMACR      | 23600     | alpha-methylacyl-CoA racemase       | 0.70246624 | 0.00474492 |
| PDCD11     | 22984     | programmed cell death 11            | 0.70199687 | 0.02096661 |
| SYS1-DBNDD | 767557    | SYS1-DBNDD2 readthrough (NM         | 0.70148562 | 0.00824841 |
| MIR3923    | 100500877 | microRNA 3923                       | 0.6992825  | 0.01412733 |
| PRSS2      | 5645      | serine protease 2                   | 0.69843913 | 0.00263394 |
| METTL4     | 64863     | methyltransferase like 4            | 0.69772989 | 0.00204344 |
| NFIX       | 4784      | nuclear factor I X                  | 0.69718566 | 0.00774445 |
| GLRX2      | 51022     | glutaredoxin 2                      | 0.69675998 | 0.0095712  |
| GSAP       | 54103     | gamma-secretase activating pro      | 0.69598806 | 0.01568881 |
| DEFB4B     | 100289462 | defensin beta 4B                    | 0.69453523 | 0.04579475 |
| NOB1       | 28987     | NIN1 (RPN12) binding protein 1      | 0.69387005 | 0.00638247 |
| ASS1       | 445       | argininosuccinate synthase 1        | 0.69084911 | 0.00511245 |
| CREBRF     | 153222    | CREB3 regulatory factor             | 0.68981773 | 0.03202817 |
| EIF2S2     | 8894      | eukaryotic translation initiation f | 0.68965401 | 0.00586671 |
| RPN1L      | 83853     | rhophilin associated tail protein   | 0.68958754 | 0.02661554 |
| PINK1-AS   | 100861548 | PINK1 antisense RNA                 | 0.68886762 | 0.04843504 |
| UTP15      | 84135     | UTP15, small subunit processom      | 0.68846493 | 0.02114272 |
| ANAPC1     | 64682     | anaphase promoting complex su       | 0.6882883  | 0.00353101 |

|           |           |                                               |            |            |
|-----------|-----------|-----------------------------------------------|------------|------------|
| POLR1A    | 25885     | RNA polymerase I subunit A                    | 0.74513267 | 0.00634031 |
| VPS13C    | 54832     | vacuolar protein sorting 13 homolog C         | 0.74493241 | 0.00099227 |
| WDR73     | 84942     | WD repeat domain 73                           | 0.74469151 | 0.0251284  |
| GTF2IRD2B | 389524    | GTF2I repeat domain containing 2B             | 0.74394316 | 0.02756235 |
| RHOBTB3   | 22836     | Rho related BTB domain containing 3           | 0.74369263 | 0.02766207 |
| DDX43     | 55510     | DEAD-box helicase 43                          | 0.74290567 | 0.04157054 |
| CCDC92    | 80212     | coiled-coil domain containing 92              | 0.74213153 | 0.03700889 |
| SH2B3     | 10019     | SH2B adaptor protein 3                        | 0.73995828 | 0.02283134 |
| EPB414A   | 64097     | erythrocyte membrane protein band 4.1 like    | 0.7378022  | 0.00188893 |
| PCK2      | 5106      | phosphoenolpyruvate carboxykinase 2, mito     | 0.737107   | 0.0277438  |
| QRAOV1    | 220064    | oral cancer overexpressed 1                   | 0.73476872 | 0.00769698 |
| MTX3      | 345778    | metaxin 3                                     | 0.73455029 | 0.0225104  |
| DHX9      | 1660      | DEXH-box helicase 9                           | 0.73244984 | 0.00099227 |
| NEIL2     | 252969    | nei like DNA glycosylase 2                    | 0.73194388 | 0.01706339 |
| SNORA47   | 677828    | small nucleolar RNA, H/ACA box 47             | 0.73174804 | 0.001317   |
| CHN1      | 1123      | chimerin 1                                    | 0.73156551 | 0.01814983 |
| SLC3A1    | 8501      | solute carrier family 43 member 1             | 0.73152541 | 0.02229176 |
| LINC00662 | 148189    | long intergenic non-protein coding RNA 662    | 0.7313714  | 0.02584432 |
| PRKAR1B   | 5575      | protein kinase cAMP-dependent type I regul    | 0.73001757 | 0.00633413 |
| SYNGAP1   | 8831      | synaptic Ras GTPase activating protein 1      | 0.72915347 | 0.0427998  |
| NHS       | 4810      | NHS actin remodeling regulator                | 0.72856334 | 0.01188103 |
| ACKR4     | 51554     | atypical chemokine receptor 4                 | 0.72793979 | 0.00507443 |
| LRIG3     | 121227    | leucine rich repeats and immunoglobulin lik   | 0.72612621 | 0.00429075 |
| NPYSR     | 4889      | neuropeptide Y receptor Y5                    | 0.72561536 | 0.00873348 |
| KIF21B    | 23046     | kinesin family member 21B                     | 0.72263528 | 0.00454836 |
| ZNF136    | 7695      | zinc finger protein 136                       | 0.72244973 | 0.03516321 |
| USP27X    | 389856    | ubiquitin specific peptidase 27, X-linked     | 0.72134227 | 0.04143086 |
| CSF1      | 1435      | colony stimulating factor 1                   | 0.71978804 | 0.00216681 |
| MIR1200   | 100302113 | microRNA 1200                                 | 0.71962563 | 0.01724591 |
| TAF1B     | 9014      | TATA-box binding protein associated factor    | 0.71917794 | 0.00261623 |
| DNASE2    | 1777      | deoxyribonuclease 2, lysosomal                | 0.71801571 | 0.00328806 |
| PTPN14    | 5784      | protein tyrosine phosphatase, non-receptor    | 0.71761141 | 0.00228369 |
| HLA-DRB5  | 3127      | major histocompatibility complex, class II, C | 0.71491053 | 0.03822159 |
| SNORA24   | 677809    | small nucleolar RNA, H/ACA box 24             | 0.71464808 | 0.03519158 |
| JDP2      | 122953    | Jun dimerization protein 2                    | 0.71410734 | 0.00272237 |
| CEP290    | 80184     | centrosomal protein 290                       | 0.71221171 | 0.0139131  |
| SUPV3L1   | 6832      | Suv3 like RNA helicase                        | 0.71175015 | 0.00170723 |
| GRB10     | 2887      | growth factor receptor bound protein 10       | 0.71174827 | 0.03098601 |
| KLHL23    | 151230    | kelch like family member 23                   | 0.71083634 | 0.03087028 |
| DIS3L2    | 129563    | DIS3 like 3'-5' exoribonuclease 2             | 0.70915053 | 0.01444033 |
| NARS      | 4677      | asparaginyl-tRNA synthetase                   | 0.70887007 | 0.00836319 |
| NP1PA1    | 9284      | nuclear pore complex interacting protein fa   | 0.70837527 | 0.03205936 |
| RAB15     | 376267    | RAB15 member RAS oncogene family              | 0.70675036 | 0.00407527 |
| ADD3      | 120       | adducin 3                                     | 0.70668485 | 0.00265059 |
| HIP1      | 3092      | huntingtin interacting protein 1              | 0.70602584 | 0.02783287 |
| HERPUD1   | 9709      | homocysteine inducible ER protein with ubi    | 0.7060119  | 0.00182614 |
| SLC7A6    | 9057      | solute carrier family 7 member 6              | 0.70376263 | 0.02658288 |
| TUBE1     | 51175     | tubulin epsilon 1                             | 0.70359688 | 0.04257296 |
| PLEKH81   | 58473     | pleckstrin homology domain containing B1      | 0.70336974 | 0.00349103 |
| RBM3      | 5935      | RNA binding motif protein 3                   | 0.70297022 | 0.02191407 |
| REF3      | 5991      | regulatory factor X3                          | 0.6982342  | 0.01388357 |
| OR1N1     | 138883    | olfactory receptor family 1 subfamily N mem   | 0.69778658 | 0.02705905 |
| ELK3      | 2004      | ELK3, ETS transcription factor                | 0.69701402 | 0.01138615 |
| ACAD8     | 27034     | acyl-CoA dehydrogenase family member 8        | 0.69646797 | 0.01847191 |
| MTA1      | 9112      | metastasis associated 1                       | 0.6957037  | 0.01943888 |
| NDUF4A2   | 56901     | NDUF4A, mitochondrial complex associat        | 0.69550174 | 0.00655449 |
| TBLX1     | 6907      | transducin beta like 1 X-linked               | 0.6952864  | 0.01010566 |
| EHF       | 26298     | ETS homologous factor                         | 0.69526126 | 0.00380658 |
| ADAMTSL4  | 54507     | ADAMTS like 4                                 | 0.69234224 | 0.01684697 |
| LIN52     | 91750     | lin-52 DREAM MuvB core complex compone        | 0.69151963 | 0.04157054 |
| ZFAND1    | 79752     | zinc finger AN1-type containing 1             | 0.69104305 | 0.00261623 |
| UST       | 10090     | uronyl 2-sulfotransferase                     | 0.69092807 | 0.02232583 |
| CDH3      | 1001      | cadherin 3                                    | 0.69092249 | 0.04282902 |
| FMNL2     | 114793    | formin like 2                                 | 0.68993943 | 0.00429226 |
| CIRBP     | 1153      | cold inducible RNA binding protein            | 0.68951001 | 0.04342896 |
| DPH5      | 51611     | diphthamide biosynthesis 5                    | 0.68785706 | 0.01530409 |
| LINC00909 | 400657    | long intergenic non-protein coding RNA 909    | 0.6868593  | 0.03586163 |
| TMEM254   | 80195     | transmembrane protein 254                     | 0.68685818 | 0.02815188 |
| TARS      | 6897      | threonyl-tRNA synthetase                      | 0.68622515 | 0.00946714 |
| PTCHD1    | 139411    | patched domain containing 1                   | 0.68610405 | 0.02875237 |
| ANKRD6    | 22881     | ankyrin repeat domain 6                       | 0.68606232 | 0.02815958 |
| ATP4B     | 496       | ATPase H+/K+ transporting beta subunit        | 0.68373083 | 0.03687019 |
| SLC25A36  | 55186     | solute carrier family 25 member 36            | 0.68321201 | 0.04556835 |
| PKZ       | 10769     | polo like kinase 2                            | 0.68320562 | 0.0075173  |

|            |           |                                       |            |            |
|------------|-----------|---------------------------------------|------------|------------|
| SLC25A26   | 115286    | solute carrier family 25 member       | 0.68812072 | 0.01278099 |
| MRPL39     | 54148     | mitochondrial ribosomal protein       | 0.68753226 | 0.00312048 |
| BCKDHA     | 593       | branched chain keto acid dehydr       | 0.68738536 | 0.01493595 |
| FXN        | 2395      | frataxin                              | 0.68734092 | 0.02167092 |
| MTIF2      | 4528      | mitochondrial translational initia    | 0.68715414 | 0.01749727 |
| NPY4R      | 5540      | neuropeptide Y receptor Y4            | 0.68709259 | 0.02507486 |
| RNMT       | 8731      | RNA guanine-7 methyltransferas        | 0.68269315 | 0.02753666 |
| MCF2L      | 23263     | MCF.2 cell line derived transform     | 0.68232743 | 0.01288736 |
| CTSO       | 1519      | cathepsin O                           | 0.68221792 | 0.04665251 |
| SMIM19     | 114926    | small integral membrane protein       | 0.68186146 | 0.01882443 |
| SCMH1      | 22955     | Scm polycomb group protein hom        | 0.68115039 | 0.00578988 |
| MRPL23     | 6150      | mitochondrial ribosomal protein       | 0.68090981 | 0.01787183 |
| ROR1       | 4919      | receptor tyrosine kinase like orph    | 0.68071769 | 0.03353196 |
| RNF130     | 55819     | ring finger protein 130               | 0.68068451 | 0.01252953 |
| DBN1       | 1627      | drebrin 1                             | 0.68050362 | 0.01282908 |
| PLSCR5     | 389158    | phospholipid scramblase family        | 0.68019121 | 0.04731341 |
| CARD16     | 114769    | caspase recruitment domain fam        | 0.67991628 | 0.01937596 |
| MUC20      | 200958    | mucin 20, cell surface associated     | 0.67935006 | 0.04043865 |
| REV3L      | 5980      | REV3 like, DNA directed polymer       | 0.67899094 | 0.01728159 |
| CACNA1D    | 776       | calcium voltage-gated channel s       | 0.67875956 | 0.00624999 |
| PIK3CG     | 5288      | phosphatidylinositol-4-phosphat       | 0.67743296 | 0.03590851 |
| KCNKG1     | 3755      | potassium voltage-gated channe        | 0.67709709 | 0.02013471 |
| ZNF239     | 8187      | zinc finger protein 239               | 0.67561874 | 0.00386458 |
| KLF11      | 8462      | Kruppel like factor 11                | 0.67514037 | 0.02762773 |
| TNFAIP3    | 7128      | TNF alpha induced protein 3           | 0.67284036 | 0.02176796 |
| GRPEL2-AS1 | 106144529 | GRPEL2 antisense RNA 1                | 0.67230679 | 0.02393189 |
| SNORA47    | 677828    | small nucleolar RNA, H/ACA box        | 0.67147458 | 0.00410122 |
| BIRC6      | 57448     | baculoviral IAP repeat containi       | 0.67139978 | 0.01561296 |
| ACOT2      | 10965     | acyl-CoA thioesterase 2               | 0.67067115 | 0.02707962 |
| NCOR2      | 9612      | nuclear receptor corepressor 2        | 0.67060334 | 0.00578988 |
| PRLR       | 5618      | prolactin receptor                    | 0.67016548 | 0.01077793 |
| MDM2       | 4193      | MDM2 proto-oncogene                   | 0.67012207 | 0.00845929 |
| AGL        | 178       | amylolytic alpha-1, 6-glucosidase, 4- | 0.66930389 | 0.02014679 |
| FAH        | 2184      | fumarylacetoacetate hydrolase         | 0.6682907  | 0.04779134 |
| TYRO3      | 7301      | TYRO3 protein tyrosine kinase         | 0.66823075 | 0.01194033 |
| DFFB       | 1677      | DNA fragmentation factor subun        | 0.66803648 | 0.01430078 |
| DENND6B    | 414918    | DENN domain containing 6B             | 0.66788431 | 0.01749727 |
| SLC25A45   | 283130    | solute carrier family 25 member       | 0.66687662 | 0.0172259  |
| EIF3F      | 8665      | eukaryotic translation initiation f   | 0.66575927 | 0.01152695 |
| DCPS       | 28960     | decapping enzyme, scavenger           | 0.66513886 | 0.03670547 |
| EPPK1      | 83481     | epiplakin 1                           | 0.6645744  | 0.03367897 |
| RPTOR      | 57521     | regulatory associated protein of      | 0.66457368 | 0.00274473 |
| R3HCC1     | 203069    | R3H domain and coiled-coil cont       | 0.66386803 | 0.02730758 |
| WDR72      | 256764    | WD repeat domain 72                   | 0.66339716 | 0.01400378 |
| WDR18      | 57418     | WD repeat domain 18                   | 0.66268326 | 0.03680876 |
| PITPNC1    | 26207     | phosphatidylinositol transfer pro     | 0.66263772 | 0.04516487 |
| ATIC       | 471       | 5-aminoimidazole-4-carboxamid         | 0.66248866 | 0.00976157 |
| MKKS       | 8195      | McKusick-Kaufman syndrome             | 0.66228483 | 0.02536567 |
| ANKH       | 56172     | ANKH inorganic pyrophosphate t        | 0.66168561 | 0.02075294 |
| SNORD49A   | 26800     | small nucleolar RNA, C/D box 49       | 0.66165814 | 0.00766691 |
| APBB2      | 323       | amyloid beta precursor protein b      | 0.66092978 | 0.02753666 |
| LINC00662  | 148189    | long intergenic non-protein codin     | 0.66053772 | 0.0475921  |
| SYBU       | 55638     | syntabulin                            | 0.66028483 | 0.01787727 |
| NUFIP1     | 26747     | NUFIP1, FMR1 interacting protei       | 0.65962246 | 0.01762837 |
| KCNQ1      | 3784      | potassium voltage-gated channe        | 0.65910142 | 0.01152192 |
| CASP8      | 841       | caspase 8                             | 0.65822044 | 0.01045399 |
| SMIM20     | 389203    | small integral membrane protein       | 0.65807618 | 0.00878451 |
| HEXA       | 3073      | hexosaminidase subunit alpha          | 0.65796847 | 0.02096661 |
| ASXL3      | 80816     | additional sex combs like 3, tran     | 0.6576062  | 0.03703786 |
| MTA1       | 9112      | metastasis associated 1               | 0.65728595 | 0.03184225 |
| PPL        | 5493      | periplakin                            | 0.65707811 | 0.02266863 |
| HUWE1      | 10075     | HECT, UBA and WWE domain co           | 0.65643835 | 0.01868408 |
| CLUAP1     | 23059     | clusterin associated protein 1        | 0.65635597 | 0.01477118 |
| FAM198B    | 51313     | family with sequence similarity 1     | 0.65561564 | 0.0095712  |
| TRUB2      | 26995     | TruB pseudouridine synthase fan       | 0.65560972 | 0.00563427 |
| TEX2       | 55852     | testis expressed 2                    | 0.65548137 | 0.02393189 |
| SRBD1      | 55133     | S1 RNA binding domain 1               | 0.65486016 | 0.01176105 |
| TSPAN16    | 26526     | tetraspanin 16                        | 0.65339908 | 0.03004045 |
| RHBD1      | 84236     | rhomboid domain containing 1          | 0.65324062 | 0.01318555 |
| MBNL2      | 10150     | muscleblind like splicing regulat     | 0.65280918 | 0.01252953 |
| ALDH1L1    | 10840     | aldehyde dehydrogenase 1 famil        | 0.65191117 | 0.02609385 |
| DLGAP1-AS2 | 84777     | DLGAP1 antisense RNA 2                | 0.65048076 | 0.03739957 |
| BORCS5     | 118426    | BLOC-1 related complex subunit        | 0.65017488 | 0.00719306 |
| ATP13A4    | 84239     | ATPase 13A4                           | 0.64789595 | 0.04483451 |

|            |           |                                                |            |             |
|------------|-----------|------------------------------------------------|------------|-------------|
| FBXW8      | 26259     | F-box and WD repeat domain containi            | 0.68303013 | 0.00550342  |
| CCDC149    | 91050     | coiled-coil domain containing 149              | 0.68284417 | 0.00302793  |
| COL18A1    | 80781     | collagen type XVIII alpha 1 chain              | 0.6808538  | 0.03593442  |
| TK2        | 7084      | thymidine kinase 2, mitochondrial              | 0.68048627 | 0.01598383  |
| TANC2      | 26115     | tetratricopeptide repeat, ankyrin repeat and   | 0.67922386 | 0.01997606  |
| DDIT4      | 54541     | DNA damage inducible transcript 4              | 0.67823285 | 0.02950497  |
| ZNF703     | 80139     | zinc finger protein 703                        | 0.67799985 | 0.00798763  |
| PIK3R1     | 5295      | phosphoinositide-3-kinase regulatory subun     | 0.6773546  | 0.00511987  |
| ATP13A4    | 84239     | ATPase 13A4                                    | 0.67696684 | 0.003108987 |
| SCMH1      | 22955     | Scm polycomb group protein homolog 1           | 0.6762775  | 0.00361143  |
| CRND2      | 643911    | colorectal neoplasia differentially expresse   | 0.6760645  | 0.038662    |
| DNAIC10    | 54431     | DnaI heat shock protein family (Hsp40) me      | 0.67579413 | 0.00565361  |
| SNPH       | 9751      | syntaphilin                                    | 0.67511755 | 0.00251694  |
| THBS3      | 7059      | thrombospondin 3                               | 0.67254455 | 0.0398527   |
| STEAP1B    | 256227    | STEAP family member 1B                         | 0.67229992 | 0.01103297  |
| MROH8      | 140699    | maestro heat like repeat family member 8       | 0.67120268 | 0.00349816  |
| MOB1B      | 92597     | MOB kinase activator 1B                        | 0.67119984 | 0.02342809  |
| SLC7A3     | 84889     | solute carrier family 7 member 3               | 0.67068165 | 0.03687019  |
| AURKC      | 6795      | aurora kinase C                                | 0.67049093 | 0.02929642  |
| HCG25      | 414765    | HLA complex group 25 (non-protein coding)      | 0.67037714 | 0.02969454  |
| QARS       | 5859      | glutamyl-tRNA synthetase                       | 0.67017749 | 0.00997376  |
| PRKAB1     | 5564      | protein kinase AMP-activated non-catalytic     | 0.66981533 | 0.00278167  |
| SDAD1      | 55153     | SDA1 domain containing 1                       | 0.66963043 | 0.0070524   |
| GLIS3      | 169792    | GLIS family zinc finger 3                      | 0.668849   | 0.00705024  |
| CFB        | 629       | complement factor B                            | 0.66864224 | 0.00261623  |
| LZTF1L     | 54585     | leucine zipper transcription factor like 1     | 0.66833668 | 0.03705029  |
| ENC1       | 8507      | ectodermal-neural cortex 1                     | 0.66741536 | 0.0158167   |
| CAPN3      | 825       | calpain 3                                      | 0.66691533 | 0.01506465  |
| NYNRIN     | 57523     | NYN domain and retroviral integrase contai     | 0.66671383 | 0.04668879  |
| CASC11     | 100270680 | cancer susceptibility 11 (non-protein coding)  | 0.66657109 | 0.04627661  |
| ADAR       | 103       | adenosine deaminase, RNA specific              | 0.66602636 | 0.01431369  |
| SLC38A2    | 54407     | solute carrier family 38 member 2              | 0.66548867 | 0.00384812  |
| FAM98B     | 283742    | family with sequence similarity 98 member      | 0.66524545 | 0.01938765  |
| R3HDM2     | 22864     | R3H domain containing 2                        | 0.66520638 | 0.00783112  |
| CD1B       | 910       | CD1b molecule                                  | 0.66490899 | 0.00182614  |
| DDX10      | 1662      | DEAD-box helicase 10                           | 0.66421634 | 0.02558959  |
| LRPPRC     | 10128     | leucine rich pentatricopeptide repeat conta    | 0.6642057  | 0.00710066  |
| FAM198B    | 51313     | family with sequence similarity 198 memb       | 0.66418385 | 0.00558798  |
| ZNF254     | 9534      | zinc finger protein 254                        | 0.66408308 | 0.00215339  |
| NFIC       | 4782      | nuclear factor 1 C                             | 0.66381283 | 0.00360237  |
| NOA1       | 84273     | nitric oxide associated 1                      | 0.66330772 | 0.00260959  |
| INPP4B     | 8821      | inositol polyphosphate-4-phosphatase type      | 0.66096326 | 0.01337344  |
| BARX2      | 8538      | BARX homeobox 2                                | 0.65959802 | 0.01864434  |
| SESN2      | 83667     | sestrin 2                                      | 0.65508376 | 0.00740245  |
| ALDH1L1    | 10840     | aldehyde dehydrogenase 1 family member         | 0.65423374 | 0.02008125  |
| TMEM63A    | 9725      | transmembrane protein 63A                      | 0.65376389 | 0.00515273  |
| OSBPL9     | 114883    | oxysterol binding protein like 9               | 0.65315955 | 0.03716755  |
| PHC1       | 1911      | polyhomeotic homolog 1                         | 0.65273313 | 0.03864103  |
| RGL1       | 23179     | ral guanine nucleotide dissociation stimulat   | 0.64979119 | 0.02623076  |
| PTCHD4     | 442213    | patched domain containing 4                    | 0.64824578 | 0.01767177  |
| AAED1      | 195827    | AhpC/TSA antioxidant enzyme domain cont        | 0.64773678 | 0.03705029  |
| SNORD116-1 | 727708    | small nucleolar RNA, C/D box 116-19            | 0.64753949 | 0.03613612  |
| NUDT3      | 11165     | nudix hydrolase 3                              | 0.64685717 | 0.00329894  |
| MTSS1L     | 92154     | MTSS1L, I-BAR domain containing                | 0.64627496 | 0.00404372  |
| ZRANB3     | 84083     | zinc finger RANBP2-type containing 3           | 0.64268175 | 0.02783287  |
| NFIA       | 4774      | nuclear factor 1 A                             | 0.6412425  | 0.00552578  |
| PIGL       | 9487      | phosphatidylinositol glycan anchor biosynth    | 0.64117314 | 0.03428478  |
| RAP1GAP2   | 23108     | RAP1 GTPase activating protein 2               | 0.64042125 | 0.004053    |
| NUDT6      | 11162     | nudix hydrolase 6                              | 0.63987871 | 0.04342748  |
| GLPIR      | 2740      | glucagon like peptide 1 receptor               | 0.63894465 | 0.02834993  |
| EIF3F      | 8665      | eukaryotic translation initiation factor 3 sub | 0.63889753 | 0.00944718  |
| SST        | 6750      | somatostatin                                   | 0.6381983  | 0.03075055  |
| ABCC3      | 8714      | ATP binding cassette subfamily C member 3      | 0.63804537 | 0.00643942  |
| COPE2      | 26958     | coatomer protein complex subunit gamma         | 0.63707559 | 0.03031073  |
| CRACR2A    | 84766     | calcium release activated channel regulator    | 0.63664974 | 0.02832427  |
| GYG2       | 8908      | glycogenin 2                                   | 0.63611267 | 0.01295555  |
| TBC1D16    | 125058    | TBC1 domain family member 16                   | 0.63574198 | 0.00261623  |
| TNFRSF10D  | 8793      | TNF receptor superfamily member 10d            | 0.63556704 | 0.01666103  |
| OTUB2      | 78990     | OTU deubiquitinase, ubiquitin aldehyde bin     | 0.63481749 | 0.0158275   |
| PPP3CA     | 5530      | protein phosphatase 3 catalytic subunit alp    | 0.63251517 | 0.00185005  |
| SULF2      | 55959     | sulfatase 2                                    | 0.63221369 | 0.02150249  |
| TNKS       | 8658      | tankyrase                                      | 0.6321854  | 0.01488624  |
| TNFRSF19   | 55504     | TNF receptor superfamily member 19             | 0.63162332 | 0.04324391  |
| SLC35F2    | 54733     | solute carrier family 35 member F2             | 0.62973278 | 0.02938077  |

|            |           |                                    |            |            |
|------------|-----------|------------------------------------|------------|------------|
| ATP1B4     | 23439     | ATPase Na+/K+ transporting fam     | 0.64700725 | 0.01561296 |
| CLYBL      | 171425    | citrate lyase beta like            | 0.64676539 | 0.03296826 |
| ZNF805     | 390980    | zinc finger protein 805            | 0.6462601  | 0.02282078 |
| POLR1A     | 25885     | RNA polymerase I subunit A         | 0.64620982 | 0.01902554 |
| COG5       | 10466     | component of oligomeric golgi c    | 0.64578389 | 0.00828949 |
| LOXL1-AS1  | 100287616 | LOXL1 antisense RNA 1              | 0.64427397 | 0.03739957 |
| LRIG3      | 121227    | leucine rich repeats and immun     | 0.64423137 | 0.01301089 |
| DECLRE1B   | 64858     | DNA cross-link repair 1B           | 0.64361426 | 0.04171616 |
| TRAP1      | 10131     | TNF receptor associated protein    | 0.64311341 | 0.04349882 |
| LINC01163  | 101927381 | long intergenic non-protein codi   | 0.64308526 | 0.01570928 |
| SARM1      | 23098     | sterile alpha and TIR motif conta  | 0.64287372 | 0.02042137 |
| C1QTNF3-AM | 100534612 | C1QTNF3-AMACR readthrough (1       | 0.64195399 | 0.00753522 |
| IMRPS18B   | 28973     | mitochondrial ribosomal protein    | 0.64195351 | 0.01070603 |
| ZFAND1     | 79752     | zinc finger AN1-type containing    | 0.64078229 | 0.00701532 |
| MTO1       | 25821     | mitochondrial tRNA translation c   | 0.6402286  | 0.02333125 |
| PIH1D1     | 55011     | PIH1 domain containing 1           | 0.64004862 | 0.01004469 |
| ATE1       | 11101     | arginyltransferase 1               | 0.63992144 | 0.0229306  |
| ORAOV1     | 220064    | oral cancer overexpressed 1        | 0.63915848 | 0.02211568 |
| SDE2       | 163859    | SDE2 telomere maintenance hor      | 0.63877613 | 0.01882443 |
| ANKRA2     | 57763     | ankyrin repeat family A member     | 0.63806565 | 0.02385708 |
| COX7A2L    | 9167      | cytochrome c oxidase subunit 7A    | 0.63791754 | 0.00463362 |
| SNPH       | 9751      | syntaphilin                        | 0.63770839 | 0.00591603 |
| RRS1       | 23212     | ribosome biogenesis regulator h    | 0.63722324 | 0.03992953 |
| LYPD6B     | 130576    | LY6/PLAUR domain containing 6I     | 0.63473524 | 0.0135338  |
| UROS       | 7390      | uroporphyrinogen III synthase      | 0.63459454 | 0.0229306  |
| NRP1       | 8829      | neuropilin 1                       | 0.63447892 | 0.02437922 |
| MOSPD1     | 56180     | motile sperm domain containing     | 0.63427044 | 0.03024505 |
| PKIG       | 11142     | cAMP-dependent protein kinase      | 0.63410776 | 0.03640358 |
| ENAH       | 55740     | ENAH, actin regulator              | 0.63408777 | 0.02093051 |
| CHN2       | 1124      | chimerin 2                         | 0.63312085 | 0.02595326 |
| ZNF442     | 79973     | zinc finger protein 442            | 0.63230029 | 0.04293624 |
| RGMB       | 285704    | repulsive guidance molecule BM     | 0.63104041 | 0.02614213 |
| SLC35F2    | 54733     | solute carrier family 35 member    | 0.63096777 | 0.03626746 |
| ZNF460     | 10794     | zinc finger protein 460            | 0.63070396 | 0.00475156 |
| SFXNA      | 119559    | sideroflexin 4                     | 0.63063029 | 0.01499376 |
| KRTAP5-AS1 | 338651    | KRTAP5-1/KRTAP5-2 antisense R      | 0.63057873 | 0.01385154 |
| TK2        | 7084      | thymidine kinase 2, mitochondria   | 0.62940418 | 0.02979232 |
| USP42      | 84132     | ubiquitin specific peptidase 42    | 0.6279342  | 0.02619168 |
| PTPRU      | 10076     | protein tyrosine phosphatase, re   | 0.6278326  | 0.01426383 |
| RNF144B    | 255488    | ring finger protein 144B           | 0.62756553 | 0.02486359 |
| AVEN       | 57099     | apoptosis and caspase activator    | 0.62694181 | 0.00866109 |
| TACO1      | 51204     | translational activator of cytochr | 0.62642    | 0.0089459  |
| MTR        | 4548      | 5-methyltetrahydrofolate-homod     | 0.62568194 | 0.01500454 |
| WDR43      | 23160     | WD repeat domain 43                | 0.62355149 | 0.01028522 |
| PYGB       | 5834      | glycogen phosphorylase B           | 0.6222368  | 0.00602051 |
| FBXL17     | 64839     | F-box and leucine rich repeat pr   | 0.62073135 | 0.03396418 |
| FAR5B      | 10056     | phenylalanyl-tRNA synthetase be    | 0.62068106 | 0.01152192 |
| TCN2       | 6948      | transcobalamin 2                   | 0.62062712 | 0.03752931 |
| DCUN1D2    | 55208     | defective in cullin neddylation 1  | 0.62039559 | 0.04552744 |
| DET1       | 55070     | DET1, COP1 ubiquitin ligase part   | 0.62016031 | 0.02493731 |
| TMPPRSS3   | 64699     | transmembrane serine protease      | 0.61896901 | 0.03633157 |
| SCUBE2     | 57758     | signal peptide, CUB domain and     | 0.61732375 | 0.02155779 |
| DZIP3      | 9666      | DAZ interacting zinc finger prote  | 0.61695367 | 0.03739957 |
| RPS4Y1     | 6192      | ribosomal protein S4, Y-linked 1   | 0.61465152 | 0.01070603 |
| NOA1       | 84273     | nitric oxide associated 1          | 0.61464575 | 0.03507443 |
| ORC3       | 23595     | origin recognition complex subun   | 0.61448394 | 0.02944652 |
| CNNM1      | 26507     | cyclin and CBS domain divalent r   | 0.61304892 | 0.02824866 |
| HEATR1     | 55127     | HEAT repeat containing 1           | 0.61243984 | 0.01861591 |
| GPR143     | 4935      | G protein-coupled receptor 143     | 0.61229624 | 0.04639051 |
| LRRCD8     | 55144     | leucine rich repeat containing 8   | 0.61196762 | 0.01115265 |
| CEP57      | 9702      | centrosomal protein 57             | 0.61150892 | 0.03669796 |
| BARX2      | 8538      | BARX homeobox 2                    | 0.61023049 | 0.03321763 |
| RBMS1      | 5937      | RNA binding motif single strand    | 0.60983681 | 0.02637176 |
| ABCA3      | 21        | ATP binding cassette subfamily A   | 0.60981018 | 0.03992953 |
| MICALL1    | 85377     | MICAL like 1                       | 0.6093974  | 0.00576562 |
| RBM43      | 375287    | RNA binding motif coiled coil 43   | 0.60875852 | 0.03025936 |
| TACC2      | 10579     | transforming acidic coiled-coil c  | 0.60634404 | 0.01356979 |
| CYC1       | 1537      | cytochrome c1                      | 0.60624751 | 0.00433353 |
| OSBP2      | 23762     | oxysterol binding protein 2        | 0.60532659 | 0.02536567 |
| SMCHD1     | 23347     | structural maintenance of chrom    | 0.60471506 | 0.00719306 |
| RNLS       | 55328     | renalase, FAD dependent amine      | 0.60441256 | 0.04490739 |
| UHRF1BP1   | 54887     | UHRF1 binding protein 1            | 0.60401936 | 0.03985085 |
| PDS51      | 23590     | decaprenyl diphosphate synthase    | 0.60372945 | 0.01886764 |
| PDK2       | 5164      | pyruvate dehydrogenase kinase 2    | 0.60352809 | 0.03571342 |

|            |           |                                                |            |            |
|------------|-----------|------------------------------------------------|------------|------------|
| SRD5A2     | 6716      | steroid 5 alpha-reductase 2                    | 0.62947193 | 0.03516166 |
| SHC3       | 53358     | SHC adaptor protein 3                          | 0.62925278 | 0.01835347 |
| SUPT3H     | 8464      | SPT3 homolog, SAGA and STAGA complex c         | 0.62883725 | 0.01538782 |
| FASLG      | 356       | Fas ligand                                     | 0.62867767 | 0.03907963 |
| UBLCP1     | 134510    | ubiquitin like domain containing CTD phosph    | 0.62832187 | 0.02576239 |
| ARHGAP23   | 57636     | Rho GTPase activating protein 23               | 0.6280314  | 0.0176175  |
| IVD        | 3712      | isovaleryl-CoA dehydrogenase                   | 0.62621478 | 0.04201122 |
| RNF20      | 56254     | ring finger protein 20                         | 0.62570412 | 0.00671844 |
| SH2D7      | 646892    | SH2 domain containing 7                        | 0.6255618  | 0.02470951 |
| MARS       | 4141      | methionyl-tRNA synthetase                      | 0.62467225 | 0.0056754  |
| ZNF358     | 140467    | zinc finger protein 358                        | 0.62449363 | 0.03697445 |
| CDKN1B     | 1027      | cyclin dependent kinase inhibitor 1B           | 0.62436898 | 0.00727264 |
| MOCOS      | 55034     | molybdenum cofactor sulfurase                  | 0.62414695 | 0.02299137 |
| BARHL1     | 56751     | BarH like homeobox 1                           | 0.61996328 | 0.00813765 |
| MYO10      | 4651      | myosin X                                       | 0.61968369 | 0.020645   |
| HSPG2      | 3339      | heparan sulfate proteoglycan 2                 | 0.61905217 | 0.02147687 |
| PCM1       | 5108      | pericentriolar material 1                      | 0.61896477 | 0.00395032 |
| NOXO1      | 124056    | NADPH oxidase organizer 1                      | 0.61844885 | 0.01138615 |
| BEST1      | 7439      | bestrophin 1                                   | 0.61810666 | 0.04552835 |
| RASA1      | 5921      | RAS p21 protein activator 1                    | 0.6176705  | 0.01538782 |
| CDSL       | 922       | CD5 molecule like                              | 0.61750916 | 0.04396328 |
| ZMYM2      | 7750      | zinc finger MYM-type containing 2              | 0.61663061 | 0.00349649 |
| LINC01363  | 101928484 | long intergenic non-protein coding RNA 136     | 0.61429704 | 0.0355627  |
| HSPA9      | 3313      | heat shock protein family A (Hsp70) membe      | 0.61403647 | 0.00381105 |
| TNRC6C-AS1 | 100131096 | TNRC6C antisense RNA 1                         | 0.61370994 | 0.04873077 |
| PTPN12     | 5782      | protein tyrosine phosphatase, non-receptor     | 0.61173502 | 0.02875237 |
| SLC38A7    | 55238     | solute carrier family 38 member 7              | 0.60993111 | 0.03343719 |
| RRN3       | 54700     | RRN3 homolog, RNA polymerase I transcrip       | 0.6089835  | 0.01575344 |
| NBR2       | 10230     | neighbor of BRCA1 gene 2 (non-protein cod      | 0.60888614 | 0.00671843 |
| LAMC1      | 3915      | laminin subunit gamma 1                        | 0.60872557 | 0.03716755 |
| COBLL1     | 22837     | cordon-bleu WH2 repeat protein like 1          | 0.60869793 | 0.0049046  |
| CUEDC1     | 404093    | CUE domain containing 1                        | 0.60840944 | 0.00836422 |
| FAM131B    | 9715      | family with sequence similarity 131 membe      | 0.60794344 | 0.0432028  |
| TRIM22     | 10346     | tripartite motif containing 22                 | 0.60734945 | 0.03011273 |
| TH2LCRR    | 101927761 | T helper type 2 locus control region associat  | 0.60655035 | 0.01430806 |
| ZMI22      | 83637     | zinc finger MIZ-type containing 2              | 0.60621047 | 0.00953026 |
| YBX3       | 8531      | Y-box binding protein 3                        | 0.60556369 | 0.00833126 |
| WDR74      | 54663     | WD repeat domain 74                            | 0.60502864 | 0.01424128 |
| MCCC1      | 56922     | methylcrotonoyl-CoA carboxylase 1              | 0.60445128 | 0.02470951 |
| RGMB       | 285704    | repulsive guidance molecule BMP co-recept      | 0.60419687 | 0.0249432  |
| ARHGEF10L  | 55160     | Rho guanine nucleotide exchange factor 10      | 0.603452   | 0.0144926  |
| CCP3       | 9236      | cell cycle progression 1                       | 0.60339999 | 0.04093753 |
| TIMM44     | 10469     | translocase of inner mitochondrial membra      | 0.60234916 | 0.02234538 |
| ANKRD29    | 147463    | ankyrin repeat domain 29                       | 0.60217601 | 0.04729193 |
| KIF2A      | 3796      | kinesin family member 2A                       | 0.60179674 | 0.02033445 |
| SLC39A10   | 57181     | solute carrier family 39 member 10             | 0.60088873 | 0.02812874 |
| NACA2      | 342538    | nascent polypeptide associated complex al      | 0.60006384 | 0.02040829 |
| UBE2E1     | 7324      | ubiquitin conjugating enzyme E2 E1             | 0.59966196 | 0.00899302 |
| MR1        | 3140      | major histocompatibility complex, class I-re   | 0.5985598  | 0.01189036 |
| RSLLD1     | 26156     | ribosomal L1 domain containing 1               | 0.59840031 | 0.00831486 |
| PYCR1      | 5831      | pyrroline-5-carboxylate reductase 1            | 0.59827781 | 0.01370992 |
| GNL2       | 29889     | G protein nucleolar 2                          | 0.59759084 | 0.01732472 |
| SYBU       | 55638     | syntabulin                                     | 0.59605787 | 0.0217081  |
| H2AFY2     | 55506     | H2A histone family member Y2                   | 0.59573259 | 0.01283756 |
| GRPEL2     | 134266    | GrpE like 2, mitochondrial                     | 0.59509236 | 0.01288751 |
| ZNF415     | 55786     | zinc finger protein 415                        | 0.5946732  | 0.04093753 |
| BTC        | 685       | betacellulin                                   | 0.59453504 | 0.02428763 |
| ARHGEF38   | 54848     | Rho guanine nucleotide exchange factor 38      | 0.59450186 | 0.02455404 |
| CHD4       | 1108      | chromodomain helicase DNA binding protei       | 0.59379384 | 0.00662572 |
| LHX2       | 9355      | LIM homeobox 2                                 | 0.59203594 | 0.03492026 |
| ARSD       | 414       | arylsulfatase D                                | 0.58976256 | 0.02319498 |
| EIF252     | 8894      | eukaryotic translation initiation factor 2 sub | 0.58942656 | 0.00903722 |
| LRIF1      | 55791     | ligand dependent nuclear receptor interacti    | 0.58842301 | 0.02407515 |
| PDLIM1     | 9124      | PDZ and LIM domain 1                           | 0.58795965 | 0.02099916 |
| DDX42      | 11325     | DEAD-box helicase 42                           | 0.58768535 | 0.00313687 |
| TBL1Y      | 90665     | transducin beta like 1 Y-linked                | 0.58698921 | 0.01133118 |
| PPP1R12B   | 4660      | protein phosphatase 1 regulatory subunit 1     | 0.58610993 | 0.04355394 |
| DMTN       | 2039      | dematin actin binding protein                  | 0.58586219 | 0.0093092  |
| SLC22A3    | 6581      | solute carrier family 22 member 3              | 0.58525023 | 0.01898482 |
| IDE        | 3416      | insulin degrading enzyme                       | 0.5846654  | 0.0225104  |
| LRIG2      | 9860      | leucine rich repeats and immunoglobulin lik    | 0.58441499 | 0.02297833 |
| HINT2      | 84681     | histidine triad nucleotide binding protein 2   | 0.58369403 | 0.01575344 |
| RABL2A     | 11159     | RAB, member of RAS oncogene family like        | 0.58346648 | 0.00944718 |
| ILF3       | 3609      | interleukin enhancer binding factor 3          | 0.58340098 | 0.00567259 |

|             |           |                                     |            |            |
|-------------|-----------|-------------------------------------|------------|------------|
| PDAP1       | 11333     | PDGFA associated protein 1          | 0.60301658 | 0.01561296 |
| SNORD92     | 692209    | small nucleolar RNA, C/D box 92     | 0.60269355 | 0.03582173 |
| ZBTB25      | 7597      | zinc finger and BTB domain cont     | 0.60184661 | 0.04910168 |
| CYFIP2      | 26999     | cytoplasmic FMR1 interacting pr     | 0.60176134 | 0.01818588 |
| PLCL2       | 23228     | phospholipase C like 2              | 0.60125094 | 0.00297808 |
| RSL24D1     | 51187     | ribosomal L24 domain containing     | 0.60112201 | 0.00774445 |
| CCDC59      | 29080     | coiled-coil domain containing 59    | 0.59974647 | 0.02196219 |
| MRPL15      | 29088     | mitochondrial ribosomal protein     | 0.59922398 | 0.03636763 |
| ACTA2       | 59        | actin, alpha 2, smooth muscle, a    | 0.59913576 | 0.04216373 |
| POFUT1      | 23509     | protein O-fucosyltransferase 1      | 0.59900997 | 0.03739957 |
| PRKAB1      | 5564      | protein kinase AMP-activated no     | 0.59800574 | 0.0089459  |
| SMARCA2     | 6595      | SWI/SNF related, matrix associa     | 0.5978697  | 0.04293624 |
| CSGALNACT2  | 55454     | chondroitin sulfate N-acetylgala    | 0.59681608 | 0.01749727 |
| MAPKAPK3    | 7867      | mitogen-activated protein kinase    | 0.59618777 | 0.02287353 |
| ABL1        | 25        | ABL proto-oncogene 1, non-recep     | 0.59589932 | 0.03202817 |
| TRRAP       | 8295      | transformation/transcription dor    | 0.59503536 | 0.03986046 |
| COG2        | 26958     | coatomer protein complex subun      | 0.59483942 | 0.0480692  |
| ZFP62       | 643836    | ZFP62 zinc finger protein           | 0.59370658 | 0.01992218 |
| SIAH1       | 6477      | siah E3 ubiquitin protein ligase 1  | 0.59338727 | 0.0270379  |
| DES1        | 27351     | desumoylating isopeptidase 1        | 0.59216904 | 0.01416068 |
| WDR12       | 55759     | WD repeat domain 12                 | 0.59201397 | 0.04950029 |
| MAK16       | 84549     | MAK16 homolog                       | 0.59153519 | 0.01262385 |
| RPF2        | 84154     | ribosome production factor 2 ho     | 0.59083568 | 0.0095712  |
| WDR45       | 11152     | WD repeat domain 45                 | 0.58916952 | 0.0089459  |
| BEND3       | 57673     | BEN domain containing 3             | 0.58891616 | 0.04471799 |
| ITGB4       | 3691      | integrin subunit beta 4             | 0.58865184 | 0.0229306  |
| NSMAF       | 8439      | neutral sphingomyelinase activa     | 0.58827835 | 0.02306633 |
| APC         | 324       | APC, WNT signaling pathway reg      | 0.58809721 | 0.02906968 |
| FAM171A1    | 221061    | family with sequence similarity 3   | 0.58781373 | 0.02393189 |
| GFPT1       | 2673      | glutamine-fructose-6-phosphat       | 0.58777012 | 0.01787727 |
| SEPS3       | 51091     | Sep (O-phosphoserine) tRNA:Sec      | 0.58776098 | 0.02912298 |
| WDR74       | 54663     | WD repeat domain 74                 | 0.58753365 | 0.02210353 |
| CERK        | 64781     | ceramide kinase                     | 0.5872     | 0.03604565 |
| EIF6        | 3692      | eukaryotic translation initiation f | 0.58713103 | 0.00861386 |
| TBC1D16     | 125058    | TBC1 domain family member 16        | 0.58709802 | 0.00719306 |
| ELP3        | 55140     | elongator acetyltransferase com     | 0.58701338 | 0.00792319 |
| SEMA4C      | 54910     | semaphorin 4C                       | 0.58636638 | 0.0182953  |
| MRPS22      | 56945     | mitochondrial ribosomal protein     | 0.58619146 | 0.00591603 |
| AKAP2       | 11217     | A-kinase anchoring protein 2        | 0.58481514 | 0.03330983 |
| PGPEP1      | 54858     | pyroglutamyl-peptidase I            | 0.58475803 | 0.03703786 |
| PHB2        | 11331     | prohibitin 2                        | 0.58401543 | 0.02824866 |
| ZFR         | 51663     | zinc finger RNA binding protein     | 0.5835498  | 0.00766691 |
| PLEKHG3     | 26030     | pleckstrin homology and RhoGEF      | 0.58329655 | 0.03294259 |
| CENPB1      | 92806     | CENPB DNA-binding domain con        | 0.58278418 | 0.04880324 |
| F2RL2       | 2151      | coagulation factor II thrombin re   | 0.58167797 | 0.04496852 |
| NAA10       | 8260      | N(alpha)-acetyltransferase 10, N    | 0.58163032 | 0.03707738 |
| FBRSL1      | 57666     | fibrosin like 1                     | 0.58133793 | 0.00991595 |
| CLUH        | 23277     | clustered mitochondria homolog      | 0.581311   | 0.01212382 |
| CAD         | 790       | carbamoyl-phosphate synthetase      | 0.5812858  | 0.01003914 |
| HSPG2       | 3339      | heparan sulfate proteoglycan 2      | 0.5805595  | 0.03507443 |
| TBC1D24     | 57465     | TBC1 domain family member 24        | 0.58022283 | 0.03110207 |
| GLUL        | 2752      | glutamate-ammonia ligase            | -0.5801971 | 0.00962575 |
| MIR5589     | 100847093 | microRNA 5589                       | -0.5817586 | 0.03728968 |
| STAG3LSP-PV | 101752399 | STAG3LSP-PVRIG2P-PILRB read         | -0.5825124 | 0.04589502 |
| CIDEB       | 27141     | cell death-inducing DFFA-like eff   | -0.5851913 | 0.04446091 |
| ANXA5       | 308       | annexin A5                          | -0.5916817 | 0.02402969 |
| SAMD9       | 54809     | sterile alpha motif domain conta    | -0.5955318 | 0.01143723 |
| FDPS        | 2224      | farnesyl diphosphate synthase       | -0.5988722 | 0.00526073 |
| ACSS2       | 55902     | acyl-CoA synthetase short chain     | -0.5996211 | 0.01428227 |
| ADI1        | 55256     | acireductone dioxygenase 1          | -0.6041289 | 0.02176796 |
| VILL        | 50853     | villin like                         | -0.6057576 | 0.01196688 |
| ACSL1       | 2180      | acyl-CoA synthetase long chain f    | -0.609059  | 0.01609673 |
| LINC01363   | 101928484 | long intergenic non-protein codin   | -0.6131725 | 0.04251199 |
| TEX30       | 93081     | testis expressed 30                 | -0.6189085 | 0.03024505 |
| ADIRF       | 10974     | adipogenesis regulatory factor      | -0.6198006 | 0.02855361 |
| ACVR1C      | 130399    | activin A receptor type 1C          | -0.6214899 | 0.0078673  |
| SOLE        | 6713      | squalene epoxidase                  | -0.6261472 | 0.0160321  |
| MSMO1       | 6307      | methylsterol monooxygenase 1        | -0.6383592 | 0.00870677 |
| ATP8B2      | 57198     | ATPase phospholipid transportin     | -0.6393485 | 0.02567596 |
| VSIG1       | 340547    | V-set and immunoglobulin doma       | -0.6433137 | 0.04797213 |
| ARMCK1      | 51309     | armadillo repeat containing, X-li   | -0.6482035 | 0.00538163 |
| PNMA1       | 9240      | PNMA family member 1                | -0.6485127 | 0.01250152 |
| GNAZ        | 2781      | G protein subunit alpha z           | -0.6488811 | 0.04078367 |
| LSS         | 4047      | lanosterol synthase                 | -0.6498611 | 0.02144448 |

|            |           |                                                |            |            |
|------------|-----------|------------------------------------------------|------------|------------|
| CDC16      | 8881      | cell division cycle 16                         | 0.58332445 | 0.00565361 |
| ZNF181     | 339318    | zinc finger protein 181                        | 0.58298474 | 0.023201   |
| EMILIN1    | 11117     | elastin microfibril interfacer 1               | 0.58259285 | 0.01767177 |
| WNK2       | 65268     | WNK lysine deficient protein kinase 2          | 0.58253934 | 0.02060959 |
| EIF2S3     | 1968      | eukaryotic translation initiation factor 2 sub | 0.58159865 | 0.01059843 |
| HNF1B      | 6928      | HNF1 homeobox B                                | 0.58135565 | 0.04552835 |
| PCCA       | 5095      | propionyl-CoA carboxylase alpha subunit        | 0.58096384 | 0.02818064 |
| ACSL1      | 2180      | acyl-CoA synthetase long chain famem           | -0.5804313 | 0.01488624 |
| IL32       | 9235      | interleukin 32                                 | -0.5817584 | 0.01584898 |
| ENTPD7     | 57089     | ectonucleoside triphosphate diphosphohydr      | -0.5823508 | 0.02043838 |
| PROSER2-AS | 219731    | PROSER2 antisense RNA 1                        | -0.5823538 | 0.03697124 |
| RAP1A      | 5906      | RAP1A, member of RAS oncogene family           | -0.5824551 | 0.03098601 |
| AKR1B1     | 231       | aldo-keto reductase family 1 member B          | -0.5838794 | 0.03628016 |
| APOC2      | 344       | apolipoprotein C2                              | -0.5850224 | 0.0169343  |
| ABHD5      | 51099     | abhydrolase domain containing 5                | -0.5852376 | 0.02296854 |
| SEC23A     | 10484     | Sec23 homolog A, coat complex II compone       | -0.5875633 | 0.03586163 |
| RAB8B      | 51762     | RAB8B, member RAS oncogene family              | -0.5877758 | 0.01189036 |
| ABHD6      | 57406     | abhydrolase domain containing 6                | -0.5886202 | 0.03886631 |
| TNNT1      | 7138      | troponin T1, slow skeletal type                | -0.589705  | 0.0299653  |
| CEACAM6    | 4680      | carcinoembryonic antigen related cell adhet    | -0.5901478 | 0.00248918 |
| PDLIM2     | 64236     | PDZ and LIM domain 2                           | -0.5907717 | 0.02158936 |
| AKR7A2     | 8574      | aldo-keto reductase family 7 member A2         | -0.5910367 | 0.00398531 |
| AGPAT2     | 10555     | 1-acylglycerol-3-phosphate O-acyltransfera     | -0.5933914 | 0.01138615 |
| RHBDL2     | 54933     | rhomboid like 2                                | -0.5937258 | 0.01538918 |
| LRRC66     | 339977    | leucine rich repeat containing 66              | -0.5944464 | 0.01980077 |
| LRRC3      | 81543     | leucine rich repeat containing 3               | -0.5953838 | 0.0139131  |
| SS18L2     | 51188     | SS18 like 2                                    | -0.5953935 | 0.02589349 |
| MVD        | 4597      | mevalonate diphosphate decarboxylase           | -0.5954029 | 0.00501888 |
| AGR3       | 155465    | anterior gradient 3, protein disulphide isom   | -0.5955665 | 0.01764373 |
| SLX1A      | 548593    | SLX1 homolog A, structure-specific endonuc     | -0.5966239 | 0.01577201 |
| RASA4B     | 100271927 | RAS p21 protein activator 4B                   | -0.5966753 | 0.01387043 |
| NIPAL1     | 152519    | NIPA like domain containing 1                  | -0.5972662 | 0.00686509 |
| SLC2A14    | 144195    | solute carrier family 2 member 14              | -0.5975018 | 0.03700889 |
| ST3GAL1    | 6482      | ST3 beta-galactoside alpha-2,3-sialyltransfe   | -0.5995305 | 0.01613569 |
| ABCA5      | 23461     | ATP binding cassette subfamily A member 5      | -0.6050585 | 0.02756235 |
| MTM1       | 4534      | myotubularin 1                                 | -0.6062328 | 0.02158015 |
| FUCA1      | 2517      | alpha-L-fucosidase 1                           | -0.6062671 | 0.00648967 |
| GDDP1      | 284161    | glycerophosphodiester phosphodiesterase d      | -0.6064186 | 0.02190605 |
| ACOX2      | 8309      | acyl-CoA oxidase 2                             | -0.6065277 | 0.01042379 |
| RAB27A     | 5873      | RAB27A, member RAS oncogene family             | -0.6071672 | 0.0139131  |
| CD68       | 968       | CD68 molecule                                  | -0.6077817 | 0.01611122 |
| SLC6A4     | 6532      | solute carrier family 6 member 4               | -0.6103971 | 0.03372039 |
| IGFBP4     | 3487      | insulin like growth factor binding protein 4   | -0.6106046 | 0.02232583 |
| BMP2       | 650       | bone morphogenetic protein 2                   | -0.6111782 | 0.02786643 |
| STARD4     | 134429    | STAR related lipid transfer domain containi    | -0.6112738 | 0.00261623 |
| CCL23      | 6368      | C-C motif chemokine ligand 23                  | -0.6113243 | 0.01142306 |
| RELL1      | 768211    | RELT like 1                                    | -0.6161077 | 0.01165856 |
| SNRNP25    | 79622     | small nuclear ribonucleoprotein U11/U12 s      | -0.6161318 | 0.017129   |
| STPG2-AS1  | 101410545 | STPG2 antisense RNA 1                          | -0.6162133 | 0.0231401  |
| HAS3       | 3038      | hyaluronan synthase 3                          | -0.6171559 | 0.00969052 |
| BDKRB2     | 624       | bradykinin receptor B2                         | -0.6182663 | 0.04199827 |
| SMPD1      | 6609      | sphingomyelin phosphodiesterase 1              | -0.6194305 | 0.01152369 |
| FAM3C      | 10447     | family with sequence similarity 3 member 4     | -0.6201536 | 0.04093753 |
| FDPS       | 2224      | farnesyl diphosphate synthase                  | -0.620463  | 0.00248918 |
| ADGR13     | 23284     | adhesion G protein-coupled receptor L3         | -0.6208929 | 0.03826803 |
| LINC01133  | 100505633 | long intergenic non-protein coding RNA 113     | -0.6218831 | 0.00771631 |
| SLC40A1    | 30061     | solute carrier family 40 member 1              | -0.6227631 | 0.02604542 |
| SLC20A1    | 6574      | solute carrier family 20 member 1              | -0.623791  | 0.0146251  |
| OR10W1     | 81341     | olfactory receptor family 10 subfamily W m     | -0.6240327 | 0.01611112 |
| CNIH4      | 29097     | cornichon family AMPA receptor auxiliary pr    | -0.6262114 | 0.00343595 |
| PROCR      | 10544     | protein C receptor                             | -0.6266214 | 0.02470951 |
| PNP        | 4860      | purine nucleoside phosphorylase                | -0.6284363 | 0.00319103 |
| MIR3909    | 100500826 | microRNA 3909                                  | -0.6290651 | 0.01993306 |
| DOX1       | 165545    | DEAQ-box RNA dependent ATPase 1                | -0.633405  | 0.01284766 |
| DDX60      | 55601     | DExD/H-box helicase 60                         | -0.6334345 | 0.0146251  |
| HTATIP2    | 10553     | HIV-1 Tat interactive protein 2                | -0.6359975 | 0.01079591 |
| EPHX2      | 2053      | epoxide hydrolase 2                            | -0.6402871 | 0.0062458  |
| PCSK5      | 5125      | proprotein convertase subtilisin/kexin type 5  | -0.6404324 | 0.03546965 |
| HLA-F-AS1  | 285830    | HLA-F antisense RNA 1                          | -0.641197  | 0.00722518 |
| SOX21      | 11166     | SRY-box 21                                     | -0.6412693 | 0.00282706 |
| DGAT2      | 84649     | diacylglycerol O-acyltransferase 2             | -0.6414055 | 0.01143299 |
| REEP3      | 221035    | receptor accessory protein 3                   | -0.6423374 | 0.00899302 |
| AKR7A3     | 22977     | aldo-keto reductase family 7 member A3         | -0.6427413 | 0.00141158 |
| BMP8B      | 656       | bone morphogenetic protein 8b                  | -0.6439645 | 0.04515191 |



|            |           |                                   |            |            |
|------------|-----------|-----------------------------------|------------|------------|
| KCNS3      | 3790      | potassium voltage-gated channe    | -0.6570666 | 0.00624999 |
| INSIG1     | 3638      | insulin induced gene 1            | -0.659974  | 0.00480276 |
| SLC6A12    | 6539      | solute carrier family 6 member 2  | -0.661491  | 0.01724339 |
| ACER2      | 340485    | alkaline ceramidase 2             | -0.662819  | 0.02439953 |
| APOC1      | 341       | apolipoprotein C1                 | -0.6651442 | 0.00334678 |
| IFNE       | 338376    | interferon epsilon                | -0.6743123 | 0.01123185 |
| PTPN22     | 26191     | protein tyrosine phosphatase, no  | -0.6756279 | 0.03669796 |
| MIR580     | 693165    | microRNA 580                      | -0.6826722 | 0.03873331 |
| SCSD       | 6309      | sterol-C5-desaturase              | -0.6843449 | 0.01301089 |
| RNU4ATAC   | 100151683 | RNA, U4atac small nuclear (U12    | -0.6878323 | 0.00605733 |
| LINC00458  | 100507428 | long intergenic non-protein codin | -0.6927216 | 0.04532626 |
| APOBEC1    | 339       | apolipoprotein B mRNA editing e   | -0.6976593 | 0.02762297 |
| SCD        | 6319      | stearoyl-CoA desaturase           | -0.7076779 | 0.01787727 |
| SFRP5      | 6425      | secreted frizzled related protein | -0.7172559 | 0.04446091 |
| HMGCS1     | 3157      | 3-hydroxy-3-methylglutaryl-CoA    | -0.7303128 | 0.00173406 |
| MFGE8      | 4240      | milk fat globule-EGF factor 8 prd | -0.7363919 | 0.01340919 |
| ID3        | 3399      | inhibitor of DNA binding 3, HLH p | -0.7412768 | 0.01474453 |
| RARB       | 5915      | retinoic acid receptor beta       | -0.7425089 | 0.00526073 |
| CHAD       | 1101      | chondroadherin                    | -0.7565808 | 0.02185715 |
| MIR181A1HG | 100131234 | MIR181A1 host gene                | -0.7594504 | 0.03992953 |
| MIR4521    | 100616406 | microRNA 4521                     | -0.7698613 | 0.02619168 |
| RAB3B      | 5865      | RAB3B, member RAS oncogene        | -0.7705992 | 0.00696825 |
| P3H2       | 55214     | prolyl 3-hydroxylase 2            | -0.7760751 | 0.03806126 |
| GATM       | 2628      | glycine amidinotransferase        | -0.7792662 | 0.0060938  |
| LINC00431  | 104355135 | long intergenic non-protein codin | -0.7815977 | 0.02595326 |
| IFI27      | 3429      | interferon alpha inducible protei | -0.786995  | 0.00194046 |
| MXRA5      | 25878     | matrix remodeling associated 5    | -0.7877554 | 0.01146655 |
| GCNT4      | 51301     | glucosaminyl (N-acetyl) transfer  | -0.7924747 | 0.03206724 |
| SLC16A3    | 9123      | solute carrier family 16 member   | -0.7978019 | 0.01868408 |
| MIR5482    | 100500856 | microRNA 5482                     | -0.8081247 | 0.03091411 |
| PLAGL1     | 5325      | PLAG1 like zinc finger 1          | -0.8108121 | 0.02432219 |
| BIRC6-AS2  | 103752586 | BIRC6 antisense RNA 2             | -0.8354996 | 0.01176105 |
| MMP1       | 4312      | matrix metalloproteinase 1        | -0.8368963 | 0.02210353 |
| TFE1       | 7031      | trefoil factor 1                  | -0.8397346 | 0.00184513 |
| MIR3662    | 100500880 | microRNA 3662                     | -0.8432212 | 0.02385708 |
| SLC9A4     | 389015    | solute carrier family 9 member A  | -0.8918541 | 0.04914832 |
| HHLA2      | 11148     | HERV-H LTR-associating 2          | -0.9062485 | 0.00578861 |
| LINC01372  | 101929736 | long intergenic non-protein codin | -0.9109344 | 0.00474492 |
| V5IG2      | 23584     | V-set and immunoglobulin doma     | -0.9136296 | 0.00114511 |
| GABBR1     | 2550      | gamma-aminobutyric acid type B    | -0.9157281 | 0.01477118 |
| GUCA2B     | 298       | guanylate cyclase activator 2B    | -0.9183128 | 0.0182953  |
| ACAT2      | 391       | acetyl-CoA acetyltransferase 2    | -0.9271565 | 0.00512142 |
| SEMA6C     | 10500     | semaphorin 6C                     | -0.9280841 | 0.01902554 |
| LRP4       | 4038      | LDL receptor related protein 4    | -0.9288951 | 0.03440088 |
| LEAP2      | 116842    | liver enriched antimicrobial pept | -0.9377786 | 0.03407614 |
| LIFR       | 3977      | LIF receptor alpha                | -0.9415657 | 0.02588412 |
| CLDN18     | 51208     | claudin 18                        | -0.9481757 | 0.02013321 |
| UGT2B28    | 54490     | UDP glucuronosyltransferase fan   | -0.959152  | 0.03643259 |
| SULT1B1    | 27284     | sulfotransferase family 1B mem    | -0.9796613 | 0.03044696 |
| RBPMS2     | 348093    | RNA binding protein, mRNA prod    | -0.9987614 | 0.01288736 |
| CDA        | 978       | cytidine deaminase                | -1.0120136 | 0.0140705  |
| HABP2      | 3026      | hyaluronan binding protein 2      | -1.0306047 | 0.0297708  |
| DKK1       | 22943     | Dickkopf WNT signaling pathway    | -1.0428697 | 0.03396418 |
| BAA1       | 570       | bile acid-CoA:amino acid N-acetyl | -1.0498188 | 0.00334678 |
| PNCK       | 139728    | pregnancy up-regulated nonubiqu   | -1.0546125 | 0.02595326 |
| CCDC144A   | 9720      | coiled-coil domain containing 14  | -1.0703907 | 0.0338229  |
| MIR186     | 406962    | microRNA 186                      | -1.0833155 | 0.01152192 |
| KLK7       | 5650      | kallikrein related peptidase 7    | -1.0978353 | 0.0002599  |
| PDZD3      | 79849     | PDZ domain containing 3           | -1.1019319 | 0.01934555 |
| BHLHE40    | 8553      | basic helix-loop-helix family mem | -1.1094305 | 0.01480105 |
| ACE2       | 59272     | angiotensin I converting enzyme   | -1.12023   | 0.03380218 |
| MIR215     | 406997    | microRNA 215                      | -1.1342186 | 0.04385956 |
| GKN2       | 200504    | gastrokine 2                      | -1.1745722 | 0.00429197 |
| MIR548U    | 100422884 | microRNA 548U                     | -1.1921643 | 0.0264929  |
| FAXDC2     | 10826     | fatty acid hydroxylase domain co  | -1.2102276 | 0.00063807 |
| SLC28A1    | 9154      | solute carrier family 28 member   | -1.2306428 | 0.0046388  |
| FADS2      | 9415      | fatty acid desaturase 2           | -1.231235  | 0.04360947 |
| P4HA1      | 5033      | prolyl 4-hydroxylase subunit alph | -1.2608865 | 0.00290433 |
| PLOD2      | 5352      | procollagen-lysine,2-oxoglutarat  | -1.2758716 | 0.04432339 |
| RAB31      | 11031     | RAB31, member RAS oncogene E      | -1.3107342 | 0.00475156 |
| TCN1       | 6947      | transcobalamin 1                  | -1.3237344 | 0.01430078 |
| SLC26A9    | 115019    | solute carrier family 26 member   | -1.3905118 | 0.02514264 |
| MIR8066    | 102465868 | microRNA 8066                     | -1.4157102 | 0.03363763 |
| SEMA3E     | 9723      | semaphorin 3E                     | -1.4161063 | 0.00269422 |

|            |           |                                             |            |            |
|------------|-----------|---------------------------------------------|------------|------------|
| TDRD7      | 23424     | tudor domain containing 7                   | -0.6451241 | 0.00787021 |
| SAMD8      | 142891    | sterile alpha motif domain contain          | -0.6489521 | 0.04559136 |
| FAM96B     | 51647     | family with sequence similarity 96 member   | -0.6500158 | 0.00200456 |
| MIRLET7E   | 406887    | microRNA let-7e                             | -0.6503202 | 0.00771631 |
| CDHR5      | 53841     | cadherin related family member 5            | -0.6515906 | 0.01867046 |
| ZDFB2      | 57683     | zinc finger DBF-type containing 2           | -0.6521431 | 0.03864404 |
| TMEM117    | 84216     | transmembrane protein 117                   | -0.6523436 | 0.00390937 |
| RAB6B      | 51560     | RAB6B, member RAS oncogene family           | -0.6532701 | 0.00879202 |
| COL17A1    | 1308      | collagen type XVII alpha 1 chain            | -0.6549097 | 0.00528698 |
| TMEM65     | 157378    | transmembrane protein 65                    | -0.6549892 | 0.02174638 |
| ISM1-AS1   | 100505536 | ISM1 antisense RNA 1                        | -0.6579055 | 0.02818064 |
| EGR1       | 1958      | early growth response 1                     | -0.6580278 | 0.01724591 |
| FAM3B      | 54097     | family with sequence similarity 3 member    | -0.658516  | 0.02922881 |
| CPQ        | 10404     | carboxypeptidase Q                          | -0.6595065 | 0.02819253 |
| ANG        | 283       | angiogenin                                  | -0.6600634 | 0.00565361 |
| CYP2C18    | 1562      | cytochrome P450 family 2 subfamily C mem    | -0.6609367 | 0.04556628 |
| NAB1       | 4664      | NGFI-A binding protein 1                    | -0.6614929 | 0.01391501 |
| HMOX1      | 3162      | heme oxygenase 1                            | -0.6619124 | 0.02448664 |
| PHM1       | 5372      | phosphomannomutase 1                        | -0.6625603 | 0.02223383 |
| SLC35D1    | 23169     | solute carrier family 35 member D1          | -0.6642758 | 0.00859772 |
| HPRT1      | 3251      | hypoxanthine phosphoribosyltransferase 1    | -0.6668391 | 0.03713595 |
| SLC7A8     | 23428     | solute carrier family 7 member 8            | -0.6694096 | 0.00553008 |
| STYK1      | 55359     | serine/threonine/tyrosine kinase 1          | -0.6699088 | 0.00947194 |
| KLK1       | 3816      | kallikrein 1                                | -0.6700858 | 0.01319979 |
| SLC10A5    | 347051    | solute carrier family 10 member 5           | -0.6713328 | 0.01509482 |
| SOX21-AS1  | 100507533 | SOX21 antisense divergent transcript 1      | -0.6721567 | 0.01242128 |
| DISP1      | 84976     | dispatched RND transporter family membe     | -0.6737457 | 0.00879027 |
| ACVR1C     | 130399    | activin A receptor type 1C                  | -0.6777047 | 0.00278167 |
| BPNT1      | 10380     | 3'(2'), 5'-bisphosphate nucleotidase 1      | -0.6779598 | 0.00370042 |
| XKR9       | 389668    | XK related 9                                | -0.6822073 | 0.02900739 |
| CA2        | 760       | carbonic anhydrase 2                        | -0.6867282 | 0.00549755 |
| CYP4F2     | 8529      | cytochrome P450 family 4 subfamily F mem    | -0.6895518 | 0.02402397 |
| ARHGAP42   | 143872    | Rho GTPase activating protein 42            | -0.6900975 | 0.0163018  |
| TMEM120A   | 83862     | transmembrane protein 120A                  | -0.6905078 | 0.00638187 |
| BPIFB1     | 92747     | BPI fold containing family B member 1       | -0.691058  | 0.01856524 |
| PCDH10     | 56126     | protocadherin beta 10                       | -0.6921165 | 0.01598383 |
| SLC13A2    | 9058      | solute carrier family 13 member 2           | -0.6973153 | 0.02190605 |
| FAM47E     | 100129583 | family with sequence similarity 47 member   | -0.6973804 | 0.01764373 |
| RFC2       | 5982      | replication factor C subunit 2              | -0.698904  | 0.0139131  |
| CASR       | 846       | calcium sensing receptor                    | -0.7014162 | 0.03392666 |
| ZNF488     | 118738    | zinc finger protein 488                     | -0.703095  | 0.0042616  |
| FGFBP1     | 9982      | fibroblast growth factor binding protein 1  | -0.7034695 | 0.01370992 |
| P2RY1      | 5028      | purinergic receptor P2Y1                    | -0.7035747 | 0.04222458 |
| HIST1H1C   | 3006      | histone cluster 1 H1 family member c        | -0.7048761 | 0.00222082 |
| IPMK       | 253430    | inositol polyphosphate multikinase          | -0.7054062 | 0.00628842 |
| B4GALT1-AS | 101929639 | B4GALT1 antisense RNA 1                     | -0.7055598 | 0.02283909 |
| STRIP2     | 57464     | striatin interacting protein 2              | -0.707595  | 0.02474602 |
| MORN5      | 254956    | MORN repeat containing 5                    | -0.7076546 | 0.03735059 |
| ENPP1      | 5167      | ectonucleotide pyrophosphatase/phosphodi    | -0.7100244 | 0.02818064 |
| OSTM1      | 28962     | osteopetrosis associated transmembrane p    | -0.7100988 | 0.024336   |
| TSPAN13    | 27075     | tetraspanin 13                              | -0.7134782 | 0.00386342 |
| LINC00881  | 100498859 | long intergenic non-protein coding RNA 881  | -0.7142659 | 0.03700889 |
| CDC43      | 83461     | cell division cycle associated 3            | -0.716029  | 0.01065413 |
| CENPJ      | 55835     | centromere protein J                        | -0.7210018 | 0.02264169 |
| RHOF       | 54509     | ras homolog family member F, Filopodia as   | -0.722918  | 0.00515273 |
| ACSF2      | 80221     | acyl-CoA synthetase family member 2         | -0.7230414 | 0.0377217  |
| SRGAP2C    | 653464    | SLIT-ROBO Rho GTPase activating protein 2   | -0.7247232 | 0.00238386 |
| HACL1      | 26061     | 2-hydroxyacyl-CoA lyase 1                   | -0.7263716 | 0.0272931  |
| ARRDC3     | 57561     | arrestin domain containing 3                | -0.7296554 | 0.03596633 |
| EXOC6B     | 23233     | exocyst complex component 6B                | -0.7319491 | 0.00845467 |
| TAS2R50    | 259296    | taste 2 receptor member 50                  | -0.7340089 | 0.01936399 |
| TRANK1     | 9881      | tetratricopeptide repeat and ankyrin repeat | -0.7341088 | 0.00969196 |
| SLC16A3    | 9123      | solute carrier family 16 member 3           | -0.7349109 | 0.02068385 |
| FADS6      | 283985    | fatty acid desaturase 6                     | -0.7361721 | 0.01094839 |
| LINC01127  | 100506328 | long intergenic non-protein coding RNA 1127 | -0.7366179 | 0.01370992 |
| HACD3      | 51495     | 3-hydroxyacyl-CoA dehydratase 3             | -0.7383097 | 0.00731198 |
| AHCYL2     | 23382     | adenosylhomocysteinease like 2              | -0.7384391 | 0.00299034 |
| VIPR1      | 7433      | vasoactive intestinal peptide receptor 1    | -0.7389579 | 0.02091509 |
| DEPDC1B    | 55789     | DEP domain containing 1B                    | -0.7390328 | 0.017129   |
| RHPN2      | 85415     | rhophilin Rho GTPase binding protein 2      | -0.7390954 | 0.00161934 |
| CPM        | 1368      | carboxypeptidase M                          | -0.739398  | 0.00428765 |
| PLAGL1     | 5325      | PLAG1 like zinc finger 1                    | -0.7398609 | 0.02816682 |
| CCNG2      | 901       | cyclin G2                                   | -0.7406131 | 0.00776591 |
| DHRS11     | 79154     | dehydrogenase/reductase 11                  | -0.742994  | 0.01407663 |

|           |           |                                                           |            |            |
|-----------|-----------|-----------------------------------------------------------|------------|------------|
| BPIFB1    | 92747     | BPI fold containing family B member                       | -1.4171227 | 0.00031413 |
| MUC5AC    | 4586      | mucin 5AC, oligomeric mucus/gel-forming                   | -1.4382486 | 0.00620708 |
| REP15     | 387849    | RAB15 effector protein                                    | -1.4519645 | 0.01594405 |
| AQP10     | 89872     | aquaporin 10                                              | -1.486324  | 0.01194033 |
| CD36      | 948       | CD36 molecule                                             | -1.5012939 | 0.00553376 |
| PCK1      | 5105      | phosphoenolpyruvate carboxykinase                         | -1.5127964 | 0.00386458 |
| GAS2L3    | 283431    | growth arrest specific 2 like 3                           | -1.5145683 | 0.03024505 |
| LINC01559 | 283422    | long intergenic non-protein coding RNA 1559               | -1.5311984 | 8.27E-05   |
| DHRS9     | 10170     | dehydrogenase/reductase 9                                 | -1.5905765 | 0.00655304 |
| MIR5484U  | 100847045 | microRNA 5484u                                            | -1.5979714 | 0.0430881  |
| ANKFN1    | 162282    | ankyrin repeat and fibronectin type 3 domain containing 1 | -1.6019069 | 0.02009829 |
| SLC11A2   | 4891      | solute carrier family 11 member 2                         | -1.6173094 | 0.00272165 |
| MIR5687   | 100847039 | microRNA 5687                                             | -1.627064  | 0.02266863 |
| RNASE1    | 6035      | ribonuclease A family member 1                            | -1.768953  | 6.37E-05   |
| CXCR4     | 7852      | C-X-C motif chemokine receptor 4                          | -1.8182634 | 0.03227903 |
| MSMB      | 4477      | microsminoprotein beta                                    | -1.8196348 | 0.00184513 |
| UCA1      | 652995    | urothelial cancer associated 1 (non-coding RNA)           | -1.9458365 | 0.00080315 |
| PSCA      | 8000      | prostate stem cell antigen                                | -2.0662814 | 2.70E-05   |
| TFF2      | 7032      | trefoil factor 2                                          | -2.0689684 | 2.17E-05   |
| EGLN3     | 112399    | egl-9 family hypoxia inducible factor 3                   | -2.1425182 | 0.00755328 |
| ALDOC     | 230       | aldolase, fructose-bisphosphate dependent                 | -2.2449962 | 0.00012826 |
| UGT2B11   | 10720     | UDP glucuronosyltransferase family 2 member B11           | -2.3117279 | 6.58E-05   |
| STR8IA6   | 338596    | STR alpha-N-acetyl-neuraminidase 6                        | -2.3256702 | 0.01152192 |
| CAPN9     | 10753     | calpain 9                                                 | -2.351904  | 7.55E-05   |
| GPX3      | 2878      | glutathione peroxidase 3                                  | -2.511567  | 1.79E-05   |
| FAM177B   | 400823    | family with sequence similarity 177 member B              | -2.519225  | 2.73E-05   |
| LINC00443 | 100874173 | long intergenic non-protein coding RNA 443                | -3.0792113 | 9.91E-05   |

|            |           |                                                             |            |            |
|------------|-----------|-------------------------------------------------------------|------------|------------|
| REG4       | 83998     | regenerating family member 4                                | -0.7460323 | 0.006096   |
| SULT1A1    | 6817      | sulfotransferase family 1A member 1                         | -0.747668  | 0.00148994 |
| TPK1       | 27010     | thiamin pyrophosphokinase 1                                 | -0.7479265 | 0.02287513 |
| FABP7      | 2173      | fatty acid binding protein 7                                | -0.7484043 | 0.03087028 |
| PER3       | 8863      | period circadian regulator 3                                | -0.7484953 | 0.00093314 |
| IL22RA1    | 58985     | interleukin 22 receptor subunit alpha 1                     | -0.7498003 | 0.00879027 |
| TMEM141    | 85014     | transmembrane protein 141                                   | -0.7500946 | 0.01212887 |
| TMEM14A    | 28978     | transmembrane protein 14A                                   | -0.7516944 | 0.00131114 |
| HIST1H4L   | 8368      | histone cluster 1 H4 family member l                        | -0.7516984 | 0.01989426 |
| LINC01220  | 731223    | long intergenic non-protein coding RNA 1220                 | -0.752822  | 0.01640753 |
| ACOT11     | 26027     | acyl-CoA thioesterase 11                                    | -0.753878  | 0.00282706 |
| CBR1       | 873       | carbonyl reductase 1                                        | -0.7561766 | 0.02483811 |
| LINC01336  | 104326191 | long intergenic non-protein coding RNA 1336                 | -0.7571321 | 0.02811033 |
| TSPAN5     | 10098     | tetraspanin 5                                               | -0.7571382 | 0.00147482 |
| RARB       | 5915      | retinoic acid receptor beta                                 | -0.7581345 | 0.00263885 |
| RDH5       | 5959      | retinol dehydrogenase 5                                     | -0.758238  | 0.00328578 |
| HSD17B11   | 51170     | hydroxysteroid 17-beta dehydrogenase 11                     | -0.759447  | 0.00243073 |
| MYO1A      | 4640      | myosin IA                                                   | -0.7596239 | 0.00798763 |
| RNF17      | 51136     | ring finger protein, transmembrane 1                        | -0.7620638 | 0.00409179 |
| AKR1B15    | 441282    | aldo-keto reductase family 1 member B15                     | -0.7625563 | 0.00511987 |
| CTNNA1     | 8727      | catenin alpha like 1                                        | -0.7643036 | 0.04733568 |
| SLC28A1    | 9154      | solute carrier family 28 member 1                           | -0.7710875 | 0.0329782  |
| AQP12A     | 375318    | aquaporin 12A                                               | -0.7764631 | 0.0163018  |
| SLC22A18AS | 5003      | solute carrier family 22 member 18 antisense transcript 1   | -0.7775214 | 0.00282706 |
| MIER3      | 166968    | MIER family member 3                                        | -0.7800665 | 0.03065001 |
| HIST1H3H   | 8357      | histone cluster 1 H3 family member h                        | -0.7826372 | 0.00648512 |
| DDX60L     | 91351     | DDX60-like box 60 like                                      | -0.7847162 | 0.01424128 |
| NCKAP5     | 344148    | NCK associated protein 5                                    | -0.7862091 | 0.01834964 |
| SAMD9      | 54809     | sterile alpha motif domain containing 9                     | -0.7885337 | 0.00127435 |
| FER1L6     | 654463    | fer-1 like family member 6                                  | -0.7889792 | 0.00644906 |
| EBP        | 10682     | emopamil binding protein (sterol isomerase)                 | -0.7894468 | 0.00234724 |
| DSN1       | 79980     | DSN1 homolog, MIS12 kinetochore complex                     | -0.7926685 | 0.04278584 |
| APOBEC3B   | 9582      | apolipoprotein B mRNA editing enzyme, cytosine deaminase 3B | -0.7952417 | 0.03056874 |
| HIST1H4D   | 8360      | histone cluster 1 H4 family member d                        | -0.7976704 | 0.01094839 |
| SLC27A2    | 11001     | solute carrier family 27 member 2                           | -0.7978247 | 0.00953026 |
| P4HA1      | 5033      | prolyl 4-hydroxylase subunit alpha 1                        | -0.7984479 | 0.02264169 |
| STK17B     | 9262      | serine/threonine kinase 17b                                 | -0.802565  | 0.01416295 |
| ID1        | 3422      | isopentenyl-diphosphate delta isomerase 1                   | -0.8039539 | 0.00327644 |
| PEPD       | 5184      | peptidase D                                                 | -0.8039925 | 0.00278167 |
| HK2        | 3099      | hexokinase 2                                                | -0.8044718 | 0.04496043 |
| COL6A1     | 1291      | collagen type VI alpha 1 chain                              | -0.8048629 | 0.00321611 |
| USP2       | 9099      | ubiquitin specific peptidase 2                              | -0.8049361 | 0.0355943  |
| FAM13A     | 10144     | family with sequence similarity 13 member A                 | -0.8053688 | 0.0493943  |
| ANGPTL4    | 51129     | angiopoietin like 4                                         | -0.8057056 | 0.01178738 |
| GSTO1      | 9446      | glutathione S-transferase omega 1                           | -0.8061134 | 0.00063291 |
| CYP3A5     | 1577      | cytochrome P450 family 3 subfamily A member 5               | -0.8067042 | 0.0049046  |
| RNA559     | 100169760 | RNA, 5S ribosomal 9                                         | -0.8079332 | 0.04260995 |
| PSD3       | 23362     | pleckstrin and Sec7 domain containing 3                     | -0.8169738 | 0.00055821 |
| STRADB     | 55437     | STE20-related kinase adaptor beta                           | -0.8175957 | 0.00562609 |
| P3H2       | 55214     | prolyl 3-hydroxylase 2                                      | -0.8190142 | 0.02470951 |
| RNA551     | 100169751 | RNA, 5S ribosomal 1                                         | -0.8210084 | 0.04143086 |
| RNA5510    | 100169761 | RNA, 5S ribosomal 10                                        | -0.8210084 | 0.04143086 |
| RNA5511    | 100169762 | RNA, 5S ribosomal 11                                        | -0.8210084 | 0.04143086 |
| RNA552     | 100169753 | RNA, 5S ribosomal 2                                         | -0.8210084 | 0.04143086 |
| RNA553     | 100169754 | RNA, 5S ribosomal 3                                         | -0.8210084 | 0.04143086 |
| RNA554     | 100169755 | RNA, 5S ribosomal 4                                         | -0.8210084 | 0.04143086 |
| RNA556     | 100169757 | RNA, 5S ribosomal 6                                         | -0.8210084 | 0.04143086 |
| MT1X       | 4501      | metallothionein 1X                                          | -0.8227502 | 0.00278167 |
| MIR642A    | 693227    | microRNA 642a                                               | -0.8234696 | 0.00407527 |
| FABP12     | 646486    | fatty acid binding protein 12                               | -0.8251107 | 0.00683915 |
| FUT11      | 170384    | fucosyltransferase 11                                       | -0.8252834 | 0.02590335 |
| TMEM139    | 135932    | transmembrane protein 139                                   | -0.8275346 | 0.00143444 |
| PLAC8      | 51316     | placenta specific 8                                         | -0.8316391 | 0.00108344 |
| PADI2      | 11240     | peptidyl arginine deiminase 2                               | -0.8338049 | 0.0262345  |
| GRAMD1C    | 54762     | GRAM domain containing 1C                                   | -0.8363632 | 0.02566474 |
| NEK2       | 4751      | NIMA related kinase 2                                       | -0.8401618 | 0.02303169 |
| V5IG2      | 23584     | V-set and immunoglobulin domain containing 2                | -0.8402944 | 0.00112841 |
| SLC16A5    | 9121      | solute carrier family 16 member 5                           | -0.8415316 | 0.00266571 |
| FAM69A     | 388650    | family with sequence similarity 69 member A                 | -0.842988  | 0.02768862 |
| SECTM1     | 6398      | secreted and transmembrane 1                                | -0.8433404 | 0.01330393 |
| AKR1B10    | 57016     | aldo-keto reductase family 1 member B10                     | -0.8442504 | 0.00406387 |
| BTN18      | 79908     | butyrophilin like 8                                         | -0.8473038 | 0.01066023 |
| RNU4ATAC   | 100151683 | RNA, U4atac small nuclear (U12-dependent)                   | -0.8480131 | 0.00096118 |
| DPYD-AS1   | 100873932 | DPYD antisense RNA 1                                        | -0.852464  | 0.03848784 |

|           |           |                                                               |            |            |
|-----------|-----------|---------------------------------------------------------------|------------|------------|
| SLC23A3   | 151295    | solute carrier family 23 member 3                             | -0.8528341 | 0.00511987 |
| PEX5L-AS2 | 101928790 | PEX5L antisense RNA 2                                         | -0.8545092 | 0.03593442 |
| SULT1A4   | 445329    | sulfotransferase family 1A member 4                           | -0.8550653 | 0.00035662 |
| A1CF      | 29974     | APOBEC1 complementation factor                                | -0.8574754 | 0.01163007 |
| OAT       | 4942      | ornithine aminotransferase                                    | -0.8581186 | 0.00169506 |
| ABCG1     | 9619      | ATP binding cassette subfamily G member                       | -0.8646008 | 0.02658288 |
| SLC9A4    | 389015    | solute carrier family 9 member A4                             | -0.8647051 | 0.04752529 |
| SLC26A4   | 5172      | solute carrier family 26 member 4                             | -0.8670076 | 0.04424537 |
| ESPL1     | 9700      | extra spindle pole bodies like 1, separase                    | -0.8680981 | 0.03324571 |
| ANO3      | 63982     | anoctamin 3                                                   | -0.8704523 | 0.01856524 |
| MBOAT2    | 129642    | membrane bound O-acyltransferase domain                       | -0.8704667 | 0.01138615 |
| ACSS2     | 55902     | acyl-CoA synthetase short chain family member                 | -0.87366   | 0.00099227 |
| VTN       | 7448      | vitronectin                                                   | -0.8750941 | 0.00584288 |
| ADH1A     | 124       | alcohol dehydrogenase 1A (class I), alpha polypeptide         | -0.8755534 | 0.01131409 |
| BCO1      | 53630     | beta-carotene oxygenase 1                                     | -0.8767489 | 0.00667557 |
| ACAT2     | 39        | acetyl-CoA acetyltransferase 2                                | -0.8779406 | 0.004053   |
| FLVCR1    | 28982     | feline leukemia virus subgroup C cellular receptor            | -0.8795894 | 0.00263885 |
| NDRG1     | 10397     | N-myc downstream regulated 1                                  | -0.8823633 | 0.02287513 |
| ERP27     | 121506    | endoplasmic reticulum protein 27                              | -0.8839685 | 0.00347904 |
| MIA2      | 4253      | melanoma inhibitory activity 2                                | -0.8843688 | 0.01364154 |
| MEP1A     | 4224      | meprin A subunit alpha                                        | -0.8872281 | 0.02252994 |
| RBP4      | 5950      | retinol binding protein 4                                     | -0.8883298 | 0.04214547 |
| KNG1      | 3827      | kininogen 1                                                   | -0.8895543 | 0.01650885 |
| LIN7A     | 8825      | lin-7 homolog A, crumbs cell polarity complex                 | -0.8904977 | 0.02341232 |
| TEX15     | 56154     | testis expressed 15, meiosis and synapsis associated          | -0.898878  | 0.04238229 |
| UGT1A1    | 54658     | UDP glucuronosyltransferase family 1 member 1                 | -0.9070346 | 0.01286059 |
| MXD1      | 4084      | MAX dimerization protein 1                                    | -0.9076513 | 0.00134588 |
| SMPDL3A   | 10924     | sphingomyelin phosphodiesterase acid like                     | -0.9136995 | 0.00194195 |
| MMP28     | 79148     | matrix metalloproteinase 28                                   | -0.9144466 | 0.00536248 |
| GAL3T1    | 9514      | galactose-3-O-sulfotransferase 1                              | -0.9178459 | 0.00276248 |
| UGT2B10   | 7365      | UDP glucuronosyltransferase family 2 member 10                | -0.9201517 | 0.02422437 |
| OASL      | 8638      | 2'-5'-oligoadenylate synthetase like                          | -0.9223273 | 0.00081817 |
| FMO5      | 2330      | flavin containing monooxygenase 5                             | -0.9235607 | 0.00141512 |
| UGCG      | 7357      | UDP-glucose ceramide glucosyltransferase                      | -0.9259768 | 0.00206586 |
| PAQR7     | 164091    | progesterone and adiponectin receptor family member           | -0.9265551 | 0.01172913 |
| GPAT3     | 84803     | glycerol-3-phosphate acyltransferase 3                        | -0.9316497 | 0.00511987 |
| INSIG1    | 3638      | insulin induced gene 1                                        | -0.9339832 | 0.00025438 |
| FA2H      | 79152     | fatty acid 2-hydroxylase                                      | -0.935695  | 0.00027929 |
| AQP3      | 360       | aquaporin 3 (Gill blood group)                                | -0.9360864 | 0.0134066  |
| BTNL3     | 10917     | butyrophilin like 3                                           | -0.9382694 | 0.00702089 |
| UGT2B28   | 54490     | UDP glucuronosyltransferase family 2 member 28                | -0.9383227 | 0.03269393 |
| DUSP5     | 1847      | dual specificity phosphatase 5                                | -0.9400783 | 0.01013816 |
| NAT2      | 10        | N-acetyltransferase 2                                         | -0.9410522 | 0.0018525  |
| IL7       | 3574      | interleukin 7                                                 | -0.9429795 | 0.01544184 |
| KCNJ3     | 3790      | potassium voltage-gated channel modifier subfamily J member 3 | -0.944616  | 0.00033511 |
| PAG1      | 55824     | phosphoprotein membrane anchor with glycosylation sites       | -0.9474112 | 0.01416566 |
| APOL1     | 8542      | apolipoprotein L1                                             | -0.947494  | 0.00882845 |
| IFNE      | 338376    | interferon epsilon                                            | -0.9507048 | 0.00081817 |
| EFNA1     | 1942      | ephrin A1                                                     | -0.9567663 | 0.024336   |
| GKN2      | 200504    | gastrokine 2                                                  | -0.9623655 | 0.00798763 |
| SLC2A1    | 6513      | solute carrier family 2 member 1                              | -0.9641374 | 0.01530409 |
| DNASE1    | 1773      | deoxyribonuclease 1                                           | -0.9681435 | 0.01343959 |
| IL6R      | 3570      | interleukin 6 receptor                                        | -0.9714101 | 0.002804   |
| EMP1      | 2012      | epithelial membrane protein 1                                 | -0.9745016 | 0.00287567 |
| GREB1L    | 80000     | GREB1 like retinoic acid receptor coactivator                 | -0.9750596 | 0.00188893 |
| IFI27     | 3429      | interferon alpha inducible protein 27                         | -0.9762412 | 0.00022484 |
| DUSP1     | 1843      | dual specificity phosphatase 1                                | -0.9788056 | 0.00033511 |
| BMP8A     | 353500    | bone morphogenetic protein 8a                                 | -0.9788715 | 0.0009314  |
| NTSE      | 4907      | 5'-nucleotidase ecto                                          | -0.9832963 | 0.00261623 |
| CSRP2     | 1466      | cysteine and glycine rich protein 2                           | -0.9864828 | 0.00512916 |
| SYTL5     | 94122     | synaptotagmin like 5                                          | -0.9870918 | 0.01189036 |
| MALL      | 7851      | mal, T cell differentiation protein like                      | -0.9875747 | 0.00192692 |
| CEACAM20  | 125931    | carcinoembryonic antigen related cell adhesion molecule 20    | -0.9885693 | 0.02350878 |
| ADIRF     | 10974     | adipogenesis regulatory factor                                | -0.9905468 | 0.00151599 |
| TEX30     | 93081     | testis expressed 30                                           | -0.9912676 | 0.00165149 |
| GPCPD1    | 56261     | glycerophosphocholine phosphodiesterase 1                     | -0.9947784 | 0.00769698 |
| ADI1      | 55256     | aldehyde reductone dioxygenase 1                              | -0.994919  | 0.00079302 |
| AQP11     | 282679    | aquaporin 11                                                  | -0.9991814 | 0.00176029 |
| CLDN23    | 137075    | claudin 23                                                    | -0.9992382 | 0.00112027 |
| TRIM40    | 135644    | tripartite motif containing 40                                | -1.0012043 | 0.00248918 |
| PRSS55    | 203074    | serine protease 55                                            | -1.0021658 | 0.02296462 |
| THRB      | 7068      | thyroid hormone receptor beta                                 | -1.0073977 | 0.00165453 |
| OPN3      | 23596     | opsin 3                                                       | -1.0093554 | 0.00565361 |
| MIR4753   | 100616224 | microRNA 4753                                                 | -1.0130682 | 0.00580209 |

|          |        |                                            |            |            |
|----------|--------|--------------------------------------------|------------|------------|
| VAMP8    | 8673   | vesicle associated membrane protein 8      | -1.0189035 | 0.00026637 |
| MOGAT3   | 346606 | monoacylglycerol O-acyltransferase 3       | -1.0227633 | 0.0009314  |
| MS4A8    | 83661  | membrane spanning 4-domains A8             | -1.0231496 | 0.00750314 |
| CTSV     | 1515   | cathepsin V                                | -1.0261953 | 0.00032768 |
| RBPM52   | 348093 | RNA binding protein, mRNA processing fact  | -1.0325766 | 0.0070941  |
| CLDN18   | 51208  | claudin 18                                 | -1.0337077 | 0.009321   |
| NEK10    | 152110 | NIMA related kinase 10                     | -1.0367565 | 0.00222082 |
| TTR      | 7276   | transthyretin                              | -1.0380556 | 0.00200456 |
| IL17RB   | 55540  | interleukin 17 receptor B                  | -1.0506343 | 0.00029253 |
| ARL14    | 80117  | ADP ribosylation factor like GTPase 14     | -1.056874  | 0.00080724 |
| FAXDC2   | 10826  | fatty acid hydroxylase domain containing 2 | -1.0586275 | 0.00093536 |
| TMEM37   | 140738 | transmembrane protein 37                   | -1.0592315 | 0.01138615 |
| SERPINI1 | 5274   | serpin family I member 1                   | -1.0613839 | 0.02287513 |
| OTC      | 5009   | ornithine carbamoyltransferase             | -1.0639388 | 0.00165149 |
| MXRA5    | 25878  | matrix remodeling associated 5             | -1.0655238 | 0.00111346 |
| ITLN1    | 55600  | intelectin 1                               | -1.0725136 | 0.00453723 |
| AADAC    | 13     | arylacetamide deacetylase                  | -1.0875703 | 0.0070524  |
| HPGD     | 3248   | 15-hydroxyprostaglandin dehydrogenase      | -1.0939933 | 0.00278167 |
| TMOD1    | 7111   | tropomodulin 1                             | -1.0963607 | 0.00803621 |
| APOL4    | 80832  | apolipoprotein L4                          | -1.1003129 | 0.00248918 |
| VILL     | 50853  | villin like                                | -1.1016737 | 0.0001383  |
| SLC31A2  | 1318   | solute carrier family 31 member 2          | -1.1054881 | 0.00014546 |
| PHGR1    | 644844 | proline, histidine and glycine rich 1      | -1.108437  | 0.0010823  |
| FRRS1    | 391059 | ferric chelate reductase 1                 | -1.1095995 | 0.00053711 |
| ALDOB    | 229    | aldolase, fructose-bisphosphate B          | -1.1098354 | 0.00470812 |
| SLC26A3  | 1811   | solute carrier family 26 member 3          | -1.1112476 | 0.00028908 |
| FUOM     | 282969 | fucose mutarotase                          | -1.1167611 | 0.00047726 |
| SNORA11  | 677799 | small nucleolar RNA, H/ACA box 11          | -1.1174494 | 0.00671844 |
| RNASE1   | 6035   | ribonuclease A family member 1, pancreati  | -1.125867  | 0.00111445 |
| SEMA6C   | 10500  | semaphorin 6C                              | -1.126777  | 0.004607   |
| SDR16C5  | 195814 | short chain dehydrogenase/reductase famil  | -1.1307721 | 0.00258266 |
| ASAH2    | 56624  | N-acylsphingosine amidohydrolase 2         | -1.1325081 | 0.01776104 |
| CRIP1    | 1396   | cysteine rich protein 1                    | -1.1341487 | 0.00036503 |
| SLC46A1  | 113235 | solute carrier family 46 member 1          | -1.1369326 | 0.00371794 |
| SLC3A1   | 6519   | solute carrier family 3 member 1           | -1.1371875 | 0.00112841 |
| CHST5    | 23563  | carbohydrate sulfotransferase 5            | -1.1376343 | 0.00151599 |
| BHLHE40  | 8553   | basic helix-loop-helix family member e40   | -1.1393616 | 0.00906551 |
| PKIB     | 5570   | cAMP-dependent protein kinase inhibitor be | -1.1530106 | 0.00118153 |
| SULT1C3  | 442038 | sulfotransferase family 1C member 3        | -1.1555307 | 0.02609339 |
| PFKFB4   | 5210   | 6-phosphofructo-2-kinase/fructose-2,6-biph | -1.1662332 | 0.02420714 |
| GUCA2B   | 2981   | guanylate cyclase activator 2B             | -1.1670557 | 0.00326692 |
| SYTL4    | 94121  | synaptotagmin like 4                       | -1.185164  | 0.00059228 |
| IL1B     | 3553   | interleukin 1 beta                         | -1.1911654 | 0.02699596 |
| TFF1     | 7031   | trefoil factor 1                           | -1.1998417 | 7.19E-05   |
| FABP1    | 2168   | fatty acid binding protein 1               | -1.2133754 | 0.00700744 |
| GPA33    | 10223  | glycoprotein A33                           | -1.2168482 | 0.00713505 |
| CEACAM18 | 729767 | carcinoembryonic antigen related cell adhe | -1.2244097 | 0.00969196 |
| LRP4     | 4038   | LDL receptor related protein 4             | -1.2244296 | 0.00655449 |
| SLC36A1  | 206358 | solute carrier family 36 member 1          | -1.2249292 | 6.84E-05   |
| MIR194-1 | 406969 | microRNA 194-1                             | -1.2274491 | 0.01159099 |
| TMEM253  | 643382 | transmembrane protein 253                  | -1.2349202 | 0.0001261  |
| SULT1E1  | 6783   | sulfotransferase family 1E member 1        | -1.2382573 | 0.03412984 |
| TM6SF2   | 53345  | transmembrane 6 superfamily member 2       | -1.2383286 | 0.00068172 |
| TUBAL3   | 79861  | tubulin alpha like 3                       | -1.2441656 | 0.00413244 |
| APOA1    | 335    | apolipoprotein A1                          | -1.2469922 | 0.02768614 |
| PRAP1    | 118471 | proline rich acidic protein 1              | -1.2551883 | 6.84E-05   |
| CA1      | 759    | carbonic anhydrase 1                       | -1.2599139 | 0.01867046 |
| RAB3B    | 5865   | RAB3B, member RAS oncogene family          | -1.2641236 | 0.0001383  |
| CLIC5    | 53405  | chloride intracellular channel 5           | -1.264631  | 0.01530409 |
| ADM      | 133    | adrenomedullin                             | -1.2760577 | 0.00916209 |
| CAPN9    | 10753  | calpain 9                                  | -1.2941042 | 0.00346267 |
| TMCC3    | 57458  | transmembrane and coiled-coil domain fam   | -1.2959534 | 0.00230315 |
| ID1      | 3397   | inhibitor of DNA binding 1, HLH protein    | -1.3024589 | 6.84E-05   |
| LIFR     | 3977   | LIF receptor alpha                         | -1.3100796 | 0.00309341 |
| RNF186   | 54546  | ring finger protein 186                    | -1.3223056 | 0.00494949 |
| ANPEP    | 290    | alanyl aminopeptidase, membrane            | -1.337648  | 6.84E-05   |
| AQP10    | 89872  | aquaporin 10                               | -1.3394818 | 0.0140763  |
| SLC4A7   | 9497   | solute carrier family 4 member 7           | -1.3490884 | 0.00248926 |
| SLC11A2  | 4891   | solute carrier family 11 member 2          | -1.3512252 | 0.0045439  |
| AQP7     | 364    | aquaporin 7                                | -1.3581606 | 0.00015167 |
| IL1R2    | 7850   | interleukin 1 receptor type 2              | -1.3642705 | 0.00110253 |
| SFRP5    | 6425   | secreted frizzled related protein 5        | -1.374308  | 0.00097696 |
| NAAA     | 27163  | N-acyl ethanolamine acid amidase           | -1.3832842 | 0.00215429 |
| CYP3A7   | 1551   | cytochrome P450 family 3 subfamily A men   | -1.398136  | 0.00060101 |

|           |           |                                               |            |            |
|-----------|-----------|-----------------------------------------------|------------|------------|
| PHLPP2    | 23035     | PH domain and leucine rich repeat protein g   | -1.4078813 | 0.00081817 |
| SLC5A4    | 6527      | solute carrier family 5 member 4              | -1.4192629 | 0.01749623 |
| MMP1      | 4312      | matrix metalloproteinase 1                    | -1.4339071 | 0.00061469 |
| PDZD3     | 79849     | PDZ domain containing 3                       | -1.4401242 | 0.00294818 |
| SCIN      | 85477     | scinderin                                     | -1.4649594 | 0.00248926 |
| FLVCR2    | 55640     | feline leukemia virus subgroup C cellular re  | -1.4753531 | 0.00248926 |
| SI        | 6476      | sucrase-isomaltase                            | -1.4881972 | 0.01138615 |
| TFF2      | 7032      | trefoil factor 2                              | -1.4887125 | 0.00013484 |
| ACER2     | 340485    | alkaline ceramidase 2                         | -1.4927516 | 9.88E-05   |
| SMIM24    | 284422    | small integral membrane protein 24            | -1.4995706 | 6.84E-05   |
| APOBEC1   | 339       | apolipoprotein B mRNA editing enzyme cat      | -1.5096989 | 0.00015689 |
| PON3      | 5446      | paraoxonase 3                                 | -1.5236547 | 0.00127435 |
| TM4SF5    | 9032      | transmembrane 4 L six family member 5         | -1.5269889 | 3.82E-05   |
| FRMD3     | 257019    | FERM domain containing 3                      | -1.5332872 | 0.00112841 |
| PNMA1     | 9240      | PNMA family member 1                          | -1.5336077 | 2.94E-05   |
| MOGAT2    | 80168     | monoacylglycerol O-acyltransferase 2          | -1.534212  | 0.00219155 |
| EPB41L3   | 23136     | erythrocyte membrane protein band 4.1 like    | -1.5354756 | 0.01725508 |
| SLC6A8    | 6535      | solute carrier family 6 member 8              | -1.5596516 | 0.00715236 |
| MIR215    | 406997    | microRNA 215                                  | -1.5856105 | 0.00674013 |
| SLC7A9    | 11136     | solute carrier family 7 member 9              | -1.5861536 | 0.01506465 |
| PLA2G12B  | 84647     | phospholipase A2 group XIIB                   | -1.6039618 | 0.00127703 |
| KLK7      | 5650      | kallikrein related peptidase 7                | -1.6424803 | 1.26E-05   |
| GDPD2     | 54857     | glycerophosphodiester phosphodiesterase d     | -1.6453046 | 0.00146775 |
| GAS2L3    | 283431    | growth arrest specific 2 like 3               | -1.6461806 | 0.01598383 |
| SUSD2     | 56241     | sushi domain containing 2                     | -1.6575229 | 0.00648512 |
| CYP27A1   | 1593      | cytochrome P450 family 27 subfamily A me      | -1.6846705 | 0.01103778 |
| HRASL52   | 54979     | HRAS like suppressor 2                        | -1.6891799 | 1.26E-05   |
| PTPRR     | 5801      | protein tyrosine phosphatase, receptor type   | -1.6896346 | 0.00120315 |
| ID3       | 3399      | inhibitor of DNA binding 3, HLH protein       | -1.7208887 | 4.25E-05   |
| XPNPEP2   | 7512      | X-prolyl aminopeptidase 2                     | -1.7227813 | 0.00363774 |
| RBP2      | 5948      | retinol binding protein 2                     | -1.7323876 | 0.02229176 |
| MMP12     | 4321      | matrix metalloproteinase 12                   | -1.760809  | 0.004053   |
| MSMB      | 4477      | microseminoprotein beta                       | -1.7865021 | 0.00111346 |
| KCNJ13    | 3769      | potassium voltage-gated channel subfamily     | -1.8207626 | 0.00263885 |
| PLOD2     | 5352      | procollagen-lysine,2-oxoglutarate 5-dioxyge   | -1.8235087 | 0.0061054  |
| HHLA2     | 11148     | HERV-H LTR-associating 2                      | -1.836576  | 2.94E-05   |
| SEMA5A    | 9037      | semaphorin 5A                                 | -1.8422784 | 3.82E-05   |
| CIDEB     | 27141     | cell death-inducing DFFA-like effector b      | -1.8488771 | 3.14E-05   |
| CDHR2     | 54825     | cadherin related family member 2              | -1.8507356 | 0.00101363 |
| SMLR1     | 100507203 | small leucine rich protein 1                  | -1.8589573 | 0.00206586 |
| REP15     | 387849    | RAB15 effector protein                        | -1.8668178 | 0.00255404 |
| SLC2A5    | 6518      | solute carrier family 2 member 5              | -1.8741218 | 0.00831486 |
| EGLN3     | 112399    | egl-9 family hypoxia inducible factor 3       | -1.8778047 | 0.00986325 |
| MGAM      | 8972      | maltase-glucoamylase                          | -1.8794622 | 0.00247061 |
| CDA       | 978       | cytidine deaminase                            | -1.8990185 | 0.00014422 |
| HNF4A-AS1 | 101927219 | HNF4A antisense RNA 1                         | -1.901531  | 0.00937922 |
| UCA1      | 652995    | urothelial cancer associated 1 (non-protein   | -1.9052292 | 0.00052419 |
| IL2RG     | 3561      | interleukin 2 receptor subunit gamma          | -1.9382627 | 1.26E-05   |
| DKK1      | 22943     | dickkopf WNT signaling pathway inhibitor 1    | -1.9397167 | 0.0007324  |
| OTOP3     | 347741    | otopetrin 3                                   | -1.9705092 | 7.19E-05   |
| GCNT4     | 51301     | glucosaminyl (N-acetyl) transferase 4, core   | -2.0031371 | 6.89E-05   |
| LINC01559 | 283422    | long intergenic non-protein coding RNA 155    | -2.0254448 | 1.26E-05   |
| MAL       | 4118      | mal, T cell differentiation protein           | -2.0644384 | 0.00054241 |
| ALDOC     | 230       | aldolase, fructose-bisphosphate C             | -2.0959803 | 0.0001383  |
| TMEM236   | 653567    | transmembrane protein 236                     | -2.1014113 | 0.0176175  |
| SEMA3E    | 9723      | semaphorin 3E                                 | -2.130714  | 7.47E-05   |
| SLC2A2    | 6514      | solute carrier family 2 member 2              | -2.1361501 | 0.00740245 |
| RAB31     | 11031     | RAB31, member RAS oncogene family             | -2.1866118 | 7.19E-05   |
| LEAP2     | 116842    | liver enriched antimicrobial peptide 2        | -2.2174814 | 0.00013046 |
| CIDEC     | 63924     | cell death inducing DFFA like effector c      | -2.2443713 | 6.49E-05   |
| AGMO      | 392636    | alkylglycerol monoxygenase                    | -2.2490558 | 0.00130361 |
| SULT1B1   | 27284     | sulfotransferase family 1B member 1           | -2.2598291 | 0.0001261  |
| ABCG2     | 9429      | ATP binding cassette subfamily G member       | -2.2765791 | 0.00013796 |
| CREB3L3   | 84699     | cAMP responsive element binding protein 3     | -2.289806  | 0.00020534 |
| ADH4      | 127       | alcohol dehydrogenase 4 (class II), pi polype | -2.3041243 | 0.00022645 |
| DHRS9     | 10170     | dehydrogenase/reductase 9                     | -2.3385905 | 0.00029253 |
| ST8SIA6   | 338596    | ST8 alpha-N-acetyl-neuraminide alpha-2,8-     | -2.3762813 | 0.00648512 |
| PSCA      | 8000      | prostate stem cell antigen                    | -2.3997936 | 1.26E-05   |
| SLC15A1   | 6564      | solute carrier family 15 member 1             | -2.4207621 | 0.00022484 |
| LINC00443 | 100874173 | long intergenic non-protein coding RNA 443    | -2.4689989 | 0.00036503 |
| MS4A10    | 341116    | membrane spanning 4-domains A10               | -2.5478198 | 0.00107341 |
| CYP3A4    | 1576      | cytochrome P450 family 3 subfamily A mem      | -2.6070429 | 0.0001261  |
| MEP1B     | 4225      | meprin A subunit beta                         | -2.6383332 | 0.00027691 |
| ACE2      | 59272     | angiotensin I converting enzyme 2             | -2.731119  | 9.88E-05   |

|         |        |                                           |            |           |
|---------|--------|-------------------------------------------|------------|-----------|
| MTTP    | 4547   | microsomal triglyceride transfer protein  | -2.7670114 | 6.49E-05  |
| UGT2B11 | 10720  | UDP glucuronosyltransferase family 2 mem  | -2.8216312 | 1.45E-05  |
| PCK1    | 5105   | phosphoenolpyruvate carboxykinase 1       | -2.9382003 | 2.46E-05  |
| APOC3   | 345    | apolipoprotein C3                         | -2.9407613 | 0.0001667 |
| G6PC    | 2538   | glucose-6-phosphatase catalytic subunit   | -2.9641097 | 7.47E-05  |
| FAM177B | 400823 | family with sequence similarity 177 membe | -2.977892  | 1.26E-05  |
| ABCC2   | 1244   | ATP binding cassette subfamily C member 2 | -3.0440141 | 6.89E-05  |
| CD36    | 948    | CD36 molecule                             | -3.3249848 | 1.45E-05  |
| APOB    | 338    | apolipoprotein B                          | -3.3548687 | 6.84E-05  |
| GPX3    | 2878   | glutathione peroxidase 3                  | -3.5421529 | 8.47E-07  |
